# Supplementary material for: Chromosome-scale assembly with a phased sex-determining region resolves features of early Z and W chromosome differentiation in a wild octoploid strawberry
Source: PubMed Central journal article supplement (PMC9339316; doi:10.1093/g3journal/jkac139), 2022-06-06
Supplement: jkac139_supplementary_data.pdf [file jkac139_supplementary_data.pdf]

## Supplemental methods

### Genome assembly

The PacBio HiFi long reads were initially assembled into contigs using hifiasm-0.13 (Cheng et al., 2021). The kmer size was set to 31, default values were kept for the other parameters. The primary assembly produced by hifiasm was then used as the backbone for the scaffolding step. A first scaffolding step was performed by ALLMAPS (Tang et al., 2015) using a male (markers that are heterozygous and homozygous in the paternal and maternal plant respectively), a female (homozygous/heterozygous in the paternal/maternal plant) and a combined linkage (markers used in the sex specific maps as well as markers heterozygous in both parents) maps as inputs. The genetic maps were produced with published target capture sequences (Tennessen et al., 2016). The short reads from a female, and a male *F. chiloensis*, and 44 of their offspring were mapped against the hifiasm primary assembly using the mem command of BWA version 0.7.17-r1188 (Li, 2013). Genotypes were called using the combination of samtools 1.10 and bcftools version 1.9 (Danecek et al., 2021). Six individuals were excluded from the rest of the analysis due to poor coverage using VCFtools 0.1.17 (Danecek et al., 2011). Sites with a quality score %QUAL<20, a depth (DP) <10, a genotype quality (GQ) <20, or a percentage of individuals with missing data (F\_missing) > 0.1 were filtered out with bcftools. The final filtered vcf file was imported into R version 4.0.3 and converted into onemap raw format using vcfr 1.12.0 (Knaus & Grünwald, 2018) followed by onemap 2.1.3 (Margarido, Souza & Garcia, 2007). Only biallelic markers with no missing data were kept for further analysis. Markers were separated depending on their segregation types and each map was made independently. A total of 4352, 2356 and 7633 were used for the female, male and combined maps respectively. Redundant markers and markers which departed from Mendelian segregation expectations were removed. The logarithm of the odds (LOD) threshold was set to 6 and the maximum recombination fraction was kept to 0.5 (default). The genetic maps were estimated using the rcd algorithm with the *make\_seq* function. The linkage maps as well as comparisons with a diploid reference genome *Fragaria vesca* v4.0.a1 (Edger et al., 2018) and octoploid reference genome *Fragaria x ananassa* 'Camarosa' v1.0.a2 (Edger et al., 2019) highlighted errors in the initial contigs from hifiasm. RagTag (Alonge et al., 2019) was used to correct the assembly based on disagreement with the reference and low coverage, to further scaffold, and to label the pseudomolecules. The program minimap2 v.2.19 (Li, 2018) was used to map the HiFi PacBio reads (-ax map-hifi) and to align the pseudomolecules to the octoploid reference for RagTag (correct: --mm2-params '-cx asm10 -z 1000' --min-cov 4 --max-cov 50 --remove-small -q 20, scaffold: --mm2-params '-N 0 -cx asm5 -z 1000' --remove-small -q 20). Due to the persistence of errors in the assembly after ragtag, manual curation was performed for five chromosomes in which a contig was split between multiple linkage groups and between multiple chromosomes of *F. vesca*. Break points were chosen based on low coverage (HiFi reads were mapped against the genome using minimap using the map-hifi option), blast results, and the presence of "N" resulting from scaffolding. No manual correction was performed (1) if the linkage maps supported the assembly despite disagreement with the *F. vesca* reference, which was the case for Fchil2-B1; or (2) if the number of markers for a linkage group was too low to infer the quality of a contig. Errors resulting from the last ragtag scaffolding step were not curated. Annotations from *Fragaria x ananassa* 'Camarosa' v. 1.0.a2 (Liu et al., 2021) were transferred to our assembly using Liftoff (Shumate & Salzberg, 2021). Repeats were identified and masked by RepeatMasker version 4.1.0 (<http://www.repeatmasker.org>) using the repeat library from *F. x ananassa* 'Camarosa'. *Fragaria* genome assemblies, annotations and the repeat library were obtained from the Genome Database for Rosaceae (Jung et al., 2019). Quality of the assembly was assessed with Quast v.5.0.0

(Mikheenko et al., 2018) and by aligning the assembly onto the diploid *F. vesca* and octoploid *F. x ananassa* reference genomes with minimap2. We expect four pseudomolecules from our octoploid assembly to match each diploid chromosome, each pseudomolecule having a different level of divergence from the diploid reference. We re-built sex-specific genetic maps using the same datasets and similar methods as described above. This time all the filtered markers were used to identify the linkage groups. Sex specific maps were then obtained by separating the markers based on their segregation pattern. The command *make\_seq* was used first to estimate the genetic maps as previously. If the results were deemed of poor quality based on the recombination fraction map the function *rdc* was used instead.

### *Genome nomenclature*

The 28 haploid chromosomes can be grouped into subgenomes of 7 chromosomes each representing four diploid progenitors (Table S1). We follow the subgenome nomenclature of (Tenessen et al., 2014) and subgenome designations of (Session & Rokhsar, 2020). The four subgenomes are labelled as Av, Bi, B1 and B2. The diploid ancestry of two subgenomes is considered resolved: *F. vesca* subsp. *bracteata* is the progenitor of the Av subgenome and *F. iinumae* is the progenitor of the Bi subgenome (Rousseau-Gueutin et al., 2009; Njuguna et al., 2012; Tennessen et al., 2014; Edger et al., 2019; Session & Rokhsar, 2020; Feng et al., 2021) On the other hand, the progenitors of the B1 and B2 two subgenomes is controversial. Using phylogenetic analysis of linkage-mapped targeted sequence, no extant diploid was resolved as a sister taxon and *F. iinumae* was the closest diploid ancestor (Tenessen et al., 2014). Using the “Phylogenetic Identification of Subgenomes” approach (<https://github.com/mrmckain/PhyDS>), the diploids *F. nipponica* and *F. viridis* were identified as the B1 and B2 progenitors (Edger et al., 2019, 2020). Subsequent studies have not supported this disposition (Liston et al., 2020; Session & Rokhsar, 2020; Feng et al., 2021; Liston & Ashman, 2021) and agree that *F. iinumae* is the closest living ancestor of the B1 and B2 subgenomes. By examining the distribution of repetitive sequence that is over-represented in one or more subgenomes, Sessions and Rokhsar (Session & Rokhsar, 2020) provided additional support for the *F. vesca* and *F. iinumae* origin of subgenomes Av and Bi. Their analysis also suggests a novel division of the remaining chromosomes, and they named these the alpha and beta subgenomes. To avoid confusion with our SDR nomenclature, we refer to these as B1 and B2. With two exceptions (chromosomes 3 and 5) their division is consistent with Tennessen et al. (Tenessen et al., 2014). In chromosome-scale phylogenetic analyses (Liston et al., 2020; Liston & Ashman, 2021) the B1 branch is either sister to *F. iinumae* plus B2, or longer than B2 when sister taxa. This was the same criterion that Tennessen et al. used to separate these subgenomes – but due to the small amount of sequence data available, their assignment of B1 and B2 for chromosome 3 and 5 was incorrect, and is corrected in this study (Table S1).

### *Sex chromosome differentiation*

For the coverage and *Fst* analysis, we originally mapped the reads of 25 males and 13 females with bwa mem (v.0.7.17-r1188) and duplicate alignments were marked with samtools fixmate/markdup (v. 1.10). For *Fst* a combination of samtools v.1.10 and bcftools v. 1.9 was used to call the genotypes. Sites with a low quality (<20) and with low read depth (<100) were excluded. Genotypes with low quality (<20) were set to missing. Sites with a high proportion of missing individual genotypes (>=0.3) were excluded. Due to concerns of over-representation of males in our original dataset, we excluded some from the both analyses. More specifically we kept males from the same geographical area when possible or nearby and

of similar autosomal read depth. The results were qualitatively similar (Fig. S6 and S16). To avoid infinite values, we added 0.001 to every value prior to compute the mean females to mean males ratio.

A 10 kbp Z-specific sequence contained a Liftoff (Shumate & Salzberg, 2021) annotated gene. A BLAST search of the CDS identified it as a putative Fbox protein. An homeologous copy was found on Fchil-Bi, and aligned to the Z-specific sequence with MAFFT (Katoh & Standley, 2013, Supplemental File 1).

Phylogenetic analysis of the 1.4 Mbp GP33 W haplotig and chromosome 6 homologs was conducted to evaluate rates of sequence evolution between the sex chromosomes and autosomes. Homeologous sequences were obtained for 4 primary contigs and 3 alternate haplotigs from the GP33 assembly (Table S3). An alternate haplotig was not assembled for Fchil-B2. In addition, the orthologous region of chromosome 6 was extracted from 5 diploid *Fragaria* species (Table S3). These 12 sequences were aligned with Mauve (Darling et al., 2004). Conserved blocks with 10-12 sequences were extracted and filtered to exclude gap columns present in 3 or more sequences, retaining 67 alignments over 1000bp (Table S4). Five alignments were reduced to 9 sequences, due to the gap filtering. The final alignment had 636,266 sites and 11.8% missing data. Partitioned maximum likelihood analysis and concordance analysis were conducted with IQ-TREE2 (Minh, Hahn & Lanfear, 2020), with best-fitting models of sequence evolution estimated for each conserved block. Branch support was evaluated with 1000 bootstrap replicates. Homeologous exchange (HE) is well-documented among the subgenomes of octoploid *Fragaria* (Tenessen et al., 2014; Edger et al., 2019; Liston & Ashman, 2021). To examine whether HE occurs within or near the SDR, discordance among blocks was used to identify regions of HE. To determine the location of HE in a large 30kb block, the block was split into 5 kb sections and phylogenies were estimated as described above for the single genes.

#### *Literature cited*

- Alonge M, Soyk S, Ramakrishnan S, Wang X, Goodwin S, Sedlazeck FJ, Lippman ZB, Schatz MC. 2019. RaGOO: fast and accurate reference-guided scaffolding of draft genomes. *Genome Biology* 20:224. DOI: 10.1186/s13059-019-1829-6.
- Cheng H, Concepcion GT, Feng X, Zhang H, Li H. 2021. Haplotype-resolved de novo assembly using phased assembly graphs with hifiasm. *Nature Methods* 18:170–175. DOI: 10.1038/s41592-020-01056-5.
- Danecek P, Auton A, Abecasis G, Albers CA, Banks E, DePristo MA, Handsaker RE, Lunter G, Marth GT, Sherry ST, McVean G, Durbin R, 1000 Genomes Project Analysis Group. 2011. The variant call format and VCFtools. *Bioinformatics* 27:2156–2158. DOI: 10.1093/bioinformatics/btr330.
- Danecek P, Bonfield JK, Liddle J, Marshall J, Ohan V, Pollard MO, Whitwham A, Keane T, McCarthy SA, Davies RM, Li H. 2021. Twelve years of SAMtools and BCFtools. *GigaScience* 10:giab008. DOI: 10.1093/gigascience/giab008.
- Darling ACE, Mau B, Blattner FR, Perna NT. 2004. Mauve: Multiple Alignment of Conserved Genomic Sequence With Rearrangements. *Genome Research* 14:1394–1403. DOI: 10.1101/gr.2289704.
- Edger PP, McKain MR, Yocca AE, Knapp SJ, Qiao Q, Zhang T. 2020. Reply to: Revisiting the origin of octoploid strawberry. *Nature Genetics* 52:5–7. DOI: 10.1038/s41588-019-0544-2.
- Edger PP, Poorten TJ, VanBuren R, Hardigan MA, Colle M, McKain MR, Smith RD, Teresi SJ, Nelson ADL, Wai CM, Alger EI, Bird KA, Yocca AE, Pumplin N, Ou S, Ben-Zvi G, Brodt A, Baruch K, Swale T, Shiue L, Acharya CB, Cole GS, Mower JP, Childs KL, Jiang N, Lyons E, Freeling M, Puzey JR, Knapp SJ. 2019.

- Origin and evolution of the octoploid strawberry genome. *Nature Genetics* 51:541–547. DOI: 10.1038/s41588-019-0356-4.
- Edger PP, VanBuren R, Colle M, Poorten TJ, Wai CM, Niederhuth CE, Alger EI, Ou S, Acharya CB, Wang J, others. 2018. Single-molecule sequencing and optical mapping yields an improved genome of woodland strawberry (*Fragaria vesca*) with chromosome-scale contiguity. *Gigascience* 7:gix124.
- Feng C, Wang J, Harris A, Folta KM, Zhao M, Kang M. 2021. Tracing the diploid ancestry of the cultivated octoploid strawberry. *Molecular Biology and Evolution* 38:478–485.
- Jung S, Lee T, Cheng C-H, Buble K, Zheng P, Yu J, Humann J, Ficklin SP, Gasic K, Scott K, Frank M, Ru S, Hough H, Evans K, Peace C, Olmstead M, DeVetter LW, McFerson J, Coe M, Wegrzyn JL, Staton ME, Abbott AG, Main D. 2019. 15 years of GDR: New data and functionality in the Genome Database for Rosaceae. *Nucleic Acids Research* 47:D1137–D1145. DOI: 10.1093/nar/gky1000.
- Katoh K, Standley DM. 2013. MAFFT multiple sequence alignment software version 7: improvements in performance and usability. *Molecular biology and evolution* 30:772–780.
- Knaus BJ, Grünwald NJ. 2018. Inferring Variation in Copy Number Using High Throughput Sequencing Data in R. *Frontiers in Genetics* 9:123. DOI: 10.3389/fgene.2018.00123.
- Li H. 2013. Aligning sequence reads, clone sequences and assembly contigs with BWA-MEM. *arXiv:1303.3997 [q-bio]*.
- Li H. 2018. Minimap2: pairwise alignment for nucleotide sequences. *Bioinformatics* 34:3094–3100. DOI: 10.1093/bioinformatics/bty191.
- Liston A, Ashman T-L. 2021. The origin and subgenome dynamics of the octoploid strawberries. In: *Acta Horticulturae*. International Society for Horticultural Science (ISHS), Leuven, Belgium, 107–118. DOI: 10.17660/ActaHortic.2021.1309.17.
- Liston A, Wei N, Tennessen JA, Li J, Dong M, Ashman T-L. 2020. Revisiting the origin of octoploid strawberry. *Nature Genetics* 52:2–4. DOI: 10.1038/s41588-019-0543-3.
- Liu T, Li M, Liu Z, Ai X, Li Y. 2021. Reannotation of the cultivated strawberry genome and establishment of a strawberry genome database. *Horticulture Research* 8:1–9. DOI: 10.1038/s41438-021-00476-4.
- Margarido GRA, Souza AP, Garcia AAF. 2007. OneMap: software for genetic mapping in outcrossing species. *Hereditas* 144:78–79. DOI: 10.1111/j.2007.0018-0661.02000.x.
- Mikheenko A, Prijbelski A, Saveliev V, Antipov D, Gurevich A. 2018. Versatile genome assembly evaluation with QUAST-LG. *Bioinformatics (Oxford, England)* 34:i142–i150. DOI: 10.1093/bioinformatics/bty266.
- Minh BQ, Hahn MW, Lanfear R. 2020. New Methods to Calculate Concordance Factors for Phylogenomic Datasets. *Molecular Biology and Evolution* 37:2727–2733. DOI: 10.1093/molbev/msaa106.
- Njuguna W, Liston A, Cronn R, Ashman T-L, Bassil N. 2012. Insights into phylogeny, sex function and age of *Fragaria* based on whole chloroplast genome sequencing. *Molecular Phylogenetics and Evolution* 66:17–29.
- Rousseau-Gueutin M, Gaston A, Aïnouche A, Aïnouche ML, Olbricht K, Staudt G, Richard L, Denoyes-Rothan B. 2009. Tracking the evolutionary history of polyploidy in *Fragaria* L. (strawberry): New insights from phylogenetic analyses of low-copy nuclear genes. *Molecular Phylogenetics and Evolution* 51:515–530. DOI: 10.1016/j.ympev.2008.12.024.
- Session A, Rokhsar D. 2020. Discovering subgenomes of octoploid strawberry with repetitive sequences. *bioRxiv:2020.11.04.330431*. DOI: 10.1101/2020.11.04.330431.

- Shumate A, Salzberg SL. 2021. Liftoff: accurate mapping of gene annotations. *Bioinformatics* 37:1639–1643. DOI: 10.1093/bioinformatics/btaa1016.
- Tang H, Zhang X, Miao C, Zhang J, Ming R, Schnable JC, Schnable PS, Lyons E, Lu J. 2015. ALLMAPS: robust scaffold ordering based on multiple maps. *Genome Biology* 16:3. DOI: 10.1186/s13059-014-0573-1.
- Tennessen JA, Govindarajulu R, Ashman T-L, Liston A. 2014. Evolutionary origins and dynamics of octoploid strawberry subgenomes revealed by dense targeted capture linkage maps. *Genome Biology and Evolution* 6:3295–3313.
- Tennessen JA, Govindarajulu R, Liston A, Ashman T-L. 2016. Homomorphic ZW chromosomes in a wild strawberry show distinctive recombination heterogeneity but a small sex-determining region. *New Phytologist* 211:1412–1423.

## Supplemental results

Table S1. *Fragaria chiloensis* GP33 chromosome pseudomolecule sizes and comparison with *F. × ananassa* ‘Camarosa’.

| GP33         | Length (bp)     | Camarosa | Length (bp)     | Camarosa / GP33 | Edger (2019) chromosome number |
|--------------|-----------------|----------|-----------------|-----------------|--------------------------------|
| Fchil1-Av    | 23959720        | Fvb1-4   | 22887349        | 0.96            | 1                              |
| Fchil1-B1    | 26021663        | Fvb1-1   | 27594200        | 1.06            | 4                              |
| Fchil1-B2    | 26641460        | Fvb1-3   | 27436561        | 1.03            | 3                              |
| Fchil1-Bi    | 25344140        | Fvb1-2   | 28910674        | 1.14            | 2                              |
| Fchil2-Av    | 29124927        | Fvb2-2   | 24782128        | 0.85            | 5                              |
| Fchil2-B1    | 28786371        | Fvb2-1   | 26582685        | 0.92            | 7                              |
| Fchil2-B2    | 28929757        | Fvb2-3   | 24073015        | 0.83            | 8                              |
| Fchil2-Bi    | 27126548        | Fvb2-4   | 26692599        | 0.98            | 6                              |
| Fchil3-Av    | 31877583        | Fvb3-4   | 27809139        | 0.87            | 9                              |
| Fchil3-B1    | 31192042        | Fvb3-1   | 32005440        | 1.03            | 12                             |
| Fchil3-B2    | 33321682        | Fvb3-3   | 29626823        | 0.89            | 11                             |
| Fchil3-Bi    | 31374497        | Fvb3-2   | 31459976        | 1.00            | 10                             |
| Fchil4-Av    | 27527683        | Fvb4-3   | 31955388        | 1.16            | 13                             |
| Fchil4-B1    | 26800935        | Fvb4-1   | 20034018        | 0.75            | 16                             |
| Fchil4-B2    | 24464411        | Fvb4-2   | 25974422        | 1.06            | 15                             |
| Fchil4-Bi    | 37483869        | Fvb4-4   | 26295489        | 0.70            | 14                             |
| Fchil5-Av    | 29583688        | Fvb5-1   | 29826953        | 1.01            | 17                             |
| Fchil5-B1    | 26427873        | Fvb5-4   | 25211045        | 0.95            | 19                             |
| Fchil5-B2    | 28462679        | Fvb5-2   | 24981319        | 0.88            | 20                             |
| Fchil5-Bi    | 24151278        | Fvb5-3   | 27452983        | 1.14            | 18                             |
| Fchil6-Av    | 35360427        | Fvb6-1   | 36657112        | 1.04            | 21                             |
| Fchil6-B1    | 33373235        | Fvb6-2   | 36124132        | 1.08            | 23                             |
| Fchil6-B2    | 35260406        | Fvb6-4   | 34274104        | 0.97            | 24                             |
| Fchil6-Bi    | 37710691        | Fvb6-3   | 43627644        | 1.16            | 22                             |
| Fchil7-Av    | 21615347        | Fvb7-2   | 32354134        | 1.50            | 25                             |
| Fchil7-B1    | 22008715        | Fvb7-4   | 23534715        | 1.07            | 28                             |
| Fchil7-B2    | 23120314        | Fvb7-1   | 32186896        | 1.39            | 27                             |
| Fchil7-Bi    | 21038310        | Fvb7-3   | 25137763        | 1.19            | 26                             |
| <b>Total</b> | <b>79809025</b> |          | <b>80548870</b> | <b>1.01</b>     |                                |
|              | <b>1</b>        |          | <b>6</b>        |                 |                                |

Table S2. Shotgun sequence samples of *Fragaria chiloensis* used in the Fst and coverage analyses.

| <b>ID</b>             | <b>Sex</b> | <b>Location</b>   | <b>NCBI SRA Accession</b>             | <b>References</b>    |
|-----------------------|------------|-------------------|---------------------------------------|----------------------|
| GP33.1* =<br>PI612489 | F          | Oregon            | SRR6149717                            | Tennessen et al 2018 |
| EUR12.1               | F          | California        | SRR6149676                            | Tennessen et al 2018 |
| EUR13.2               | F          | California        | SRR6149675                            | Tennessen et al 2018 |
| EUR17.1               | F          | California        | SRR6149682                            | Tennessen et al 2018 |
| HM12.1                | F          | Oregon            | SRR6149716                            | Tennessen et al 2018 |
| HM16.1                | F          | Oregon            | SRR6149718                            | Tennessen et al 2018 |
| PTR14.3               | F          | California        | SRR6149705                            | Tennessen et al 2018 |
| SAL6.1                | F          | Oregon            | SRR6149704                            | Tennessen et al 2018 |
| SAL8.1                | F          | Oregon            | SRR6149710                            | Tennessen et al 2018 |
| PI551458              | SDR        | Washington        | SRX7023237, SRX7023236                | Hardigan et al. 2020 |
| PI551468              | SDR        | Oregon            | SRX7023229, SRX7023228,<br>SRX7023227 | Hardigan et al. 2020 |
| PI612490              | SDR        | California        | SRX7023253, SRX7023252,<br>SRX7023251 | Hardigan et al. 2020 |
| PI616652              | SDR        | Bristish Columbia | SRX7023256, SRX7023255,<br>SRX7023254 | Hardigan et al. 2020 |
| EUR9.1                | MH         | California        | SRR6149679                            | Tennessen et al 2018 |
| HM13.1                | MH         | Oregon            | SRR6149719                            | Tennessen et al 2018 |
| PIS3.1                | MH         | Oregon            | SRR6149694                            | Tennessen et al 2018 |
| PTR17.1               | MH         | California        | SRR6149672                            | Tennessen et al 2018 |
| SAL4.1                | MH         | Oregon            | SRR6149673                            | Tennessen et al 2018 |
| PTR19.2               | H          | California        | SRR6149713                            | Tennessen et al 2018 |
| PTR5.3                | H          | California        | SRR6149703                            | Tennessen et al 2018 |
| SAL3.1                | H          | Oregon            | SRR6149684                            | Tennessen et al 2018 |
| PIS5.1 *              | MH         | Oregon            | SRR6149702                            | Tennessen et al 2018 |
| PI551467              | noSD<br>R  | Oregon            | SRX7023240, SRX7023239,<br>SRX7023238 | Hardigan et al. 2020 |
| PI551735              | noSD<br>R  | Alaska            | SRX7023242, SRX7023241                | Hardigan et al. 2020 |
| PI551753              | noSD<br>R  | California        | SRX7023234, SRX7023233,<br>SRX7023232 | Hardigan et al. 2020 |
| PI551765              | noSD<br>R  | Oregon            | SRX7023249, SRX7023244,<br>SRX7023243 | Hardigan et al. 2020 |

\* samples used for Fst but not for coverage analysis

Table S3. Sequences included in the phylogenetic analysis of the GP33 Z and W chromosomes, autosomes, and diploid *Fragaria* species.

| Sequence          | Length | Haplotig or Coordinates | Source                                    |
|-------------------|--------|-------------------------|-------------------------------------------|
|                   | 147041 |                         |                                           |
| Fchil6-Av (Z)     | 0      | 33890018-35360427       | this publication                          |
|                   | 133944 |                         |                                           |
| Fchil6-Av_atg (W) | 5      | atg000165l              | this publication                          |
|                   | 142023 |                         |                                           |
| Fchil6-B1         | 8      | 31952998-33373235       | this publication                          |
| Fchil6-B1_atg     | 611097 | atg001016l              | this publication                          |
|                   | 101693 |                         |                                           |
| Fchil6-B2         | 0      | 34243477-35260406       | this publication                          |
|                   | 134555 |                         |                                           |
| Fchil6-Bi         | 4      | 36365138-37710691       | this publication                          |
| Fchil6-Bi_atg     | 320426 | atg000414l              | this publication                          |
|                   | 152688 |                         |                                           |
| Fves6             | 5      | 38042876-39569760       | <i>F. vesca</i> (Edger et al. 2018)       |
|                   | 119569 |                         |                                           |
| Fiin6             | 4      | 41401417-42597110       | <i>F. iinumae</i> (Edger et al. 2020)     |
|                   | 158054 |                         |                                           |
| Fnil6             | 3      | 49098618-50679160       | <i>F. nilgerrensis</i> (Feng et al. 2020) |
|                   | 190923 |                         |                                           |
| Fnub6             | 6      | 38859317-40768552       | <i>F. nubicola</i> (Feng et al. 2020)     |
|                   | 149431 |                         |                                           |
| Fvir6             | 8      | 35987002-37481319       | <i>F. viridis</i> (Feng et al. 2020)      |



Table S4. Phylogenetic input and results for the concatenated matrix and each Mauve block in the IQ-Tree concordance analysis.

| ID | Mauve block | sequences | length (bp) | informative sites | model     | lnL      | tree length |
|----|-------------|-----------|-------------|-------------------|-----------|----------|-------------|
| 1  | LCB_067     | 10        | 2596        | 59                | HKY+F+G4  | -5106.08 | 0.0928      |
| 2  | LCB_080     | 10        | 25583       | 975               | HKY+F+R3  | -57685.6 | 0.1506      |
| 3  | LCB_100     | 10        | 13227       | 453               | HKY+F+I   | -29047.9 | 0.1376      |
| 4  | LCB_101     | 10        | 11621       | 635               | HKY+F+G4  | -29022.1 | 0.202       |
| 5  | LCB_115     | 10        | 3039        | 68                | HKY+F+G4  | -6580.39 | 0.1291      |
| 6  | LCB_120     | 10        | 4476        | 151               | HKY+F+G4  | -10236.5 | 0.1665      |
| 7  | LCB_127     | 10        | 2791        | 72                | HKY+F+G4  | -5933.56 | 0.1301      |
| 8  | LCB_128     | 10        | 6395        | 154               | HKY+F+G4  | -13167.9 | 0.1088      |
| 9  | LCB_133     | 10        | 3265        | 125               | HKY+F+G4  | -7661.84 | 0.1767      |
| 10 | LCB_137     | 10        | 8916        | 378               | TPM3+F+G4 | -20407.8 | 0.1546      |
| 11 | LCB_138     | 10        | 15357       | 514               | HKY+F+G4  | -33236.1 | 0.1331      |
| 12 | LCB_139     | 10        | 4621        | 175               | HKY+F+G4  | -10301.3 | 0.137       |
| 13 | LCB_150     | 10        | 29783       | 781               | TN+F+I+G4 | -63259.1 | 0.1268      |
| 14 | LCB_217     | 9         | 4710        | 151               | TPM3+F+I  | -9782.12 | 0.1221      |
| 15 | LCB_219     | 10        | 1505        | 60                | TPM3+F+G4 | -3574.54 | 0.1855      |
| 16 | LCB_222     | 9         | 10476       | 312               | HKY+F+G4  | -21669.9 | 0.1119      |
| 17 | LCB_267     | 11        | 3488        | 148               | HKY+F+I   | -7717.8  | 0.1535      |
| 18 | LCB_268     | 11        | 7534        | 289               | HKY+F+G4  | -16705.4 | 0.1502      |
| 19 | LCB_272     | 11        | 6860        | 229               | HKY+F+G4  | -14846.9 | 0.1283      |
| 20 | LCB_274     | 11        | 5278        | 216               | HKY+F+R2  | -11555.4 | 0.1492      |
| 21 | LCB_277     | 11        | 20965       | 1198              | HKY+F+R3  | -44907.3 | 0.1533      |
| 22 | LCB_300     | 10        | 13358       | 266               | HKY+F+I   | -26406.3 | 0.1055      |

|    |         |    |       |      |                 |          |            |
|----|---------|----|-------|------|-----------------|----------|------------|
| 23 | LCB_301 | 10 | 14511 | 725  | HKY+F+G4        | -35195   | 0.182<br>2 |
| 24 | LCB_302 | 11 | 9400  | 476  | K3Pu+F+R2       | -21880.7 | 0.174<br>4 |
| 25 | LCB_312 | 10 | 1555  | 53   | HKY+F+G4        | -3533.61 | 0.150<br>8 |
| 26 | LCB_320 | 12 | 3112  | 146  | HKY+F+I         | -7260.9  | 0.177<br>5 |
| 27 | LCB_321 | 12 | 8232  | 289  | HKY+F+G4        | -17170.3 | 0.109<br>6 |
| 28 | LCB_328 | 10 | 4454  | 172  | HKY+F+G4        | -9982.68 | 0.145<br>6 |
| 29 | LCB_330 | 11 | 6983  | 393  | HKY+F+G4        | -15797.6 | 0.151<br>5 |
| 30 | LCB_331 | 11 | 25165 | 1154 | TPM3+F+I+G<br>4 | -57315.1 | 0.150<br>2 |
| 31 | LCB_332 | 11 | 1324  | 78   | K2P+I           | -2898.84 | 0.140<br>2 |
| 32 | LCB_347 | 9  | 31227 | 901  | HKY+F+G4        | -64418.9 | 0.109<br>6 |
| 33 | LCB_351 | 10 | 2146  | 60   | HKY+F           | -4671.59 | 0.130<br>4 |
| 34 | LCB_357 | 10 | 23474 | 813  | HKY+F+G4        | -49042.2 | 0.117<br>1 |
| 35 | LCB_360 | 12 | 20203 | 976  | HKY+F+I         | -44137.8 | 0.138      |
| 36 | LCB_363 | 12 | 7558  | 461  | TPM3+F+G4       | -18049.3 | 0.187<br>9 |
| 37 | LCB_364 | 11 | 3096  | 112  | HKY+F+G4        | -6320.24 | 0.106      |
| 38 | LCB_366 | 9  | 30077 | 886  | TPM2+F+G4       | -62844.7 | 0.115<br>2 |
| 39 | LCB_367 | 11 | 2151  | 141  | K3Pu+F+G4       | -5343.64 | 0.219<br>7 |
| 40 | LCB_368 | 11 | 1609  | 67   | HKY+F+G4        | -3643.62 | 0.155<br>5 |
| 41 | LCB_381 | 10 | 25498 | 953  | TPM2+F+I+G<br>4 | -57003.6 | 0.150<br>9 |
| 42 | LCB_385 | 10 | 3342  | 83   | HKY+F+G4        | -6808.16 | 0.104<br>8 |
| 43 | LCB_386 | 11 | 5497  | 248  | HKY+F+G4        | -12673.3 | 0.162<br>6 |
| 44 | LCB_387 | 11 | 13352 | 533  | TPM3+F+G4       | -29735.8 | 0.141<br>2 |
| 45 | LCB_390 | 12 | 8652  | 402  | K3Pu+F+G4       | -19048.3 | 0.132      |
| 46 | LCB_391 | 12 | 2525  | 122  | HKY+F+I         | -5679.88 | 0.147<br>8 |

|    |         |    |        |       |            |                                   |            |
|----|---------|----|--------|-------|------------|-----------------------------------|------------|
| 47 | LCB_400 | 10 | 2389   | 96    | HKY+F+G4   | -5504.88                          | 0.160<br>2 |
| 48 | LCB_402 | 10 | 13925  | 394   | HKY+F+G4   | -29264.2                          | 0.120<br>1 |
| 49 | LCB_417 | 10 | 5097   | 205   | HKY+F+G4   | -11579.5                          | 0.151<br>5 |
| 50 | LCB_420 | 12 | 10690  | 781   | HKY+F+G4   | -27186.5                          | 0.197<br>3 |
| 51 | LCB_421 | 12 | 2656   | 156   | HKY+F+G4   | -5968.73                          | 0.135<br>5 |
| 52 | LCB_423 | 12 | 8678   | 464   | HKY+F+G4   | -19369.4                          | 0.142<br>7 |
| 53 | LCB_424 | 12 | 4020   | 151   | HKY+F+G4   | -8466.89                          | 0.116<br>7 |
| 54 | LCB_425 | 12 | 6210   | 449   | HKY+F+G4   | -15897.1                          | 0.198<br>3 |
| 55 | LCB_445 | 10 | 5432   | 156   | HKY+F+G4   | -12307.3                          | 0.160<br>6 |
| 56 | LCB_446 | 10 | 7912   | 211   | HKY+F+I    | -16165                            | 0.105<br>8 |
| 57 | LCB_453 | 11 | 5198   | 412   | HKY+F+G4   | -12084.8                          | 0.162<br>8 |
| 58 | LCB_474 | 12 | 10350  | 394   | HKY+F+G4   | -22130                            | 0.121<br>9 |
| 59 | LCB_475 | 12 | 22624  | 1135  | HKY+F+I+G4 | -49692                            | 0.138<br>6 |
| 60 | LCB_476 | 10 | 10736  | 291   | HKY+F+G4   | -22174                            | 0.117<br>4 |
| 61 | LCB_477 | 11 | 1532   | 62    | TPM3+F+G4  | -3043.37                          | 0.110<br>3 |
| 62 | LCB_478 | 12 | 3947   | 194   | HKY+F+I    | -8709.49                          | 0.140<br>2 |
| 63 | LCB_481 | 12 | 5151   | 195   | HKY+F+G4   | -10698.6                          | 0.111<br>6 |
| 64 | LCB_492 | 12 | 16296  | 908   | HKY+F+G4   | -34595.1                          | 0.120<br>8 |
| 65 | LCB_496 | 12 | 9266   | 515   | HKY+F+G4   | -21148.3                          | 0.152<br>8 |
| 66 | LCB_498 | 11 | 17599  | 755   | HKY+F+R2   | -40128                            | 0.157<br>5 |
| 67 | LCB_500 | 12 | 5571   | 267   | HKY+F+R2   | -12397.6                          | 0.148<br>4 |
|    | All     | 12 | 636266 | 25844 |            | -1397693.1125<br>(s.e. 1773.4217) | 9.576<br>9 |

Table S5. Phylogenetic input and results for the five SDR genes.

| <b>Gene</b>                | <b>sequences</b> | <b>length<br/>(bp)</b> | <b>inform<br/>-ative<br/>sites</b> | <b>best-fit<br/>model</b> | <b>optimal lnL</b> | <b>sister group</b> |
|----------------------------|------------------|------------------------|------------------------------------|---------------------------|--------------------|---------------------|
| GME                        | 11               | 1217                   | 25                                 | K2P                       | -2062.14           | Fchil_6_B2          |
| RPPOW                      | 34               | 4294                   | 329                                | HKY+F+G4                  | -9384.58           | Fchil_7_B2          |
| glucan endo-1              | 21               | 1308                   | 388                                | HKY+F+G4                  | -4096.01           | FxaC_6_B1           |
| purple acid<br>phosphatase | 7                | 496                    | 5                                  | JC                        | -1050.69           | FxaC_6_B1           |
| unchar. protein            | 6                | 1477                   | 84                                 | TN+F                      | -4197.98           | Uncertain           |

Table S6. Concordance between mapped target capture marker locations on the GP33 assembly and the genetic linkage groups.

| <b>Female Chromosome</b> | <b>LG</b> | <b>Total markers</b> | <b>Markers from the same chromosome</b> | <b>Markers from a different homeolog of the same base chromosome</b> | <b>Markers from a different base chromosome</b> |
|--------------------------|-----------|----------------------|-----------------------------------------|----------------------------------------------------------------------|-------------------------------------------------|
| Fchil1-Av                | 8         | 50                   | 48                                      | 2                                                                    | 0                                               |
| Fchil1-B1                | 1         | 28                   | 26                                      | 2                                                                    | 0                                               |
| Fchil1-B2                | 3         | 24                   | 22                                      | 2                                                                    | 0                                               |
| Fchil1-Bi                | 4         | 26                   | 24                                      | 2                                                                    | 0                                               |
| Fchil2-Av                | 11        | 67                   | 63                                      | 4                                                                    | 0                                               |
| Fchil2-B1                | 5         | 47                   | 44                                      | 3                                                                    | 0                                               |
| Fchil2-B2                | 10        | 57                   | 47                                      | 9                                                                    | 1                                               |
| Fchil2-Bi                | 12        | 27                   | 24                                      | 2                                                                    | 1                                               |
| Fchil3-Av                | 17        | 51                   | 43                                      | 8                                                                    | 0                                               |
| Fchil3-B1                | 6         | 28                   | 26                                      | 1                                                                    | 1                                               |
| Fchil3-B2                | 23        | 28                   | 27                                      | 1                                                                    | 0                                               |
| Fchil3-Bi                | 16        | 22                   | 19                                      | 3                                                                    | 0                                               |
| Fchil4-Av                | 29        | 54                   | 47                                      | 7                                                                    | 0                                               |
| Fchil4-B1                | 27        | 34                   | 32                                      | 2                                                                    | 0                                               |
| Fchil4-B2                | 28        | 33                   | 20                                      | 13                                                                   | 0                                               |
| Fchil4-Bi                | 7         | 20                   | 17                                      | 2                                                                    | 1                                               |
| Fchil5-Av                | 33        | 59                   | 58                                      | 1                                                                    | 0                                               |
| Fchil5-B1                | 34        | 49                   | 42                                      | 7                                                                    | 0                                               |
| Fchil5-B2                | 30        | 31                   | 26                                      | 4                                                                    | 1                                               |
| Fchil5-Bi                | 9         | 40                   | 32                                      | 7                                                                    | 1                                               |
| Fchil6-Av                | 24        | 63                   | 55                                      | 4                                                                    | 4                                               |
| Fchil6-B1                | 19        | 49                   | 42                                      | 6                                                                    | 1                                               |
| Fchil6-B2                | 38        | 36                   | 31                                      | 5                                                                    | 0                                               |
| Fchil6-Bi                | 20        | 73                   | 65                                      | 8                                                                    | 0                                               |
| Fchil7-Av                | 2         | 47                   | 45                                      | 1                                                                    | 1                                               |
| Fchil7-B1                | 42        | 44                   | 35                                      | 9                                                                    | 0                                               |
| Fchil7-B2                | 40        | 36                   | 33                                      | 3                                                                    | 0                                               |
| Fchil7-Bi                | 41        | 35                   | 32                                      | 3                                                                    | 0                                               |

Table S6. (continued)

| <b>Male Chromosome</b> | <b>LG</b> | <b>Total markers</b> | <b>Markers from the same chromosome</b> | <b>Markers from a different homeolog of the same base chromosome</b> | <b>Markers from a different base chromosome</b> |
|------------------------|-----------|----------------------|-----------------------------------------|----------------------------------------------------------------------|-------------------------------------------------|
| Fchil1-Av              | 8         | 35                   | 35                                      | 0                                                                    | 0                                               |
| Fchil1-B1              | 1         | 20                   | 20                                      | 0                                                                    | 0                                               |
| Fchil1-B2              | 3         | 16                   | 15                                      | 1                                                                    | 0                                               |
| Fchil1-Bi              | 4         | 21                   | 19                                      | 2                                                                    | 0                                               |
| Fchil2-Av              | 11        | 50                   | 49                                      | 1                                                                    | 0                                               |
| Fchil2-B1              | 5         | 35                   | 34                                      | 0                                                                    | 1                                               |
| Fchil2-B2              | 10        | 36                   | 28                                      | 6                                                                    | 2                                               |
| Fchil2-Bi              | 12        | 26                   | 26                                      | 0                                                                    | 0                                               |
| Fchil3-Av              | 17        | 41                   | 40                                      | 1                                                                    | 0                                               |
| Fchil3-B1              | 6         | 24                   | 24                                      | 0                                                                    | 0                                               |
| Fchil3-B2              | 23        | 23                   | 22                                      | 1                                                                    | 0                                               |
| Fchil3-Bi              | 16        | 15                   | 15                                      | 0                                                                    | 0                                               |
| Fchil4-Av              | 29        | 38                   | 37                                      | 1                                                                    | 0                                               |
| Fchil4-B1              | 27        | 27                   | 26                                      | 1                                                                    | 0                                               |
| Fchil4-B2              | 28        | 31                   | 20                                      | 11                                                                   | 0                                               |
| Fchil4-Bi              | 7         | 14                   | 14                                      | 0                                                                    | 0                                               |
| Fchil5-Av              | 33        | 52                   | 49                                      | 1                                                                    | 2                                               |
| Fchil5-B1              | 34        | 28                   | 26                                      | 2                                                                    | 0                                               |
| Fchil5-B2              | 30        | 14                   | 14                                      | 0                                                                    | 0                                               |
| Fchil5-Bi              | 9         | 21                   | 15                                      | 6                                                                    | 0                                               |
| Fchil6-Av              | 24        | 79                   | 79                                      | 0                                                                    | 0                                               |
| Fchil6-B1              | 19        | 41                   | 39                                      | 2                                                                    | 0                                               |
| Fchil6-B2              | 38        | 45                   | 45                                      | 0                                                                    | 0                                               |
| Fchil6-Bi              | 20        | 41                   | 36                                      | 3                                                                    | 2                                               |
| Fchil7-Av              | 2         | 40                   | 39                                      | 1                                                                    | 0                                               |
| Fchil7-B1              | 42        | 17                   | 17                                      | 0                                                                    | 0                                               |
| Fchil7-B2              | 40        | 15                   | 13                                      | 2                                                                    | 0                                               |
| Fchil7-Bi              | 41        | 35                   | 33                                      | 2                                                                    | 0                                               |

Table S7. Conserved single copy orthologs (BUSCOs) by subgenome and genome for the octoploids *F. chiloensis* GP33 and *F. × ananassa* ‘Camarosa’ and diploids *F. vesca* and *F. iinumae*. N=2326.

|              | <b>complete</b> | <b>single</b> | <b>duplicate</b> | <b>fragmented</b> | <b>missing</b> |
|--------------|-----------------|---------------|------------------|-------------------|----------------|
| GP33_Av      | 95.2%           | 92.7%         | 2.5%             | 1.0%              | 3.8%           |
| GP33_B1      | 81.7%           | 79.5%         | 2.2%             | 2.1%              | 16.2%          |
| GP33_B2      | 81.6%           | 78.7%         | 2.9%             | 1.8%              | 16.6%          |
| GP33_Bi      | 86.8%           | 82.3%         | 4.5%             | 1.4%              | 11.8%          |
| GP33_all     | 99.0%           | 3.1%          | 95.9%            | 0.2%              | 0.8%           |
|              |                 |               |                  |                   |                |
| Camarosa_Av  | 89.0%           | 77.9%         | 11.1%            | 1.0%              | 10.0%          |
| Camarosa_B1  | 78.9%           | 75.6%         | 3.3%             | 1.8%              | 19.3%          |
| Camarosa_B2  | 81.6%           | 76.2%         | 5.4%             | 2.5%              | 15.9%          |
| Camarosa_Bi  | 88.9%           | 82.6%         | 6.3%             | 1.4%              | 9.7%           |
| Camarosa_all | 99.1%           | 3.7%          | 95.4%            | 0.1%              | 0.8%           |
|              |                 |               |                  |                   |                |
| vesca        | 98.2%           | 96.1%         | 2.1%             | 0.6%              | 1.2%           |
| iinumae      | 97.4%           | 95.3%         | 2.1%             | 0.5%              | 2.1%           |

Table S8. Duplicated conserved single copy orthologs (BUSCOs) by chromosome in the octoploids *F. chiloensis* GP33 and *F. × ananassa* 'Camarosa' and diploids *F. vesca* and *F. iinumae*. Shaded counts are >4× the diploid chromosome.

| chromosome      | GP33 | Camaros<br>a | chromosom<br>e | vesca | iinuma<br>e |
|-----------------|------|--------------|----------------|-------|-------------|
| Av_1-4          | 12   | 15           | 1              | 14    | 10          |
| Av_2-2          | 16   | 18           | 2              | 13    | 13          |
| Av_3-4          | 18   | 17           | 3              | 12    | 19          |
| Av_4-3          | 13   | 82           | 4              | 12    | 13          |
| Av_5-1          | 23   | 91           | 5              | 16    | 13          |
| Av_6-1          | 34   | 81           | 6              | 21    | 14          |
| Av_7-2          | 11   | 224          | 7              | 16    | 12          |
| subgenome total | 127  | 528          | Total          | 104   | 94          |
|                 |      |              |                |       |             |
| B1_1-1          | 17   | 34           |                |       |             |
| B1_2-1          | 28   | 24           |                |       |             |
| B1_3-1          | 12   | 26           |                |       |             |
| B1_4-1          | 18   | 15           |                |       |             |
| B1_5-4          | 14   | 11           |                |       |             |
| B1_6-2          | 20   | 36           |                |       |             |
| B1_7-4          | 10   | 24           |                |       |             |
| subgenome total | 119  | 170          |                |       |             |
|                 |      |              |                |       |             |
| B2_1-3          | 13   | 24           |                |       |             |
| B2_2-3          | 41   | 16           |                |       |             |
| B2_3-3          | 14   | 20           |                |       |             |
| B2_4-2          | 37   | 13           |                |       |             |
| B2_5-2          | 10   | 19           |                |       |             |
| B2_6-4          | 16   | 14           |                |       |             |
| B2_7-1          | 12   | 162          |                |       |             |
| subgenome total | 143  | 268          |                |       |             |
|                 |      |              |                |       |             |
| Bi_1-2          | 12   | 69           |                |       |             |
| Bi_2-4          | 18   | 19           |                |       |             |
| Bi_3-2          | 12   | 13           |                |       |             |
| Bi_4-4          | 129  | 17           |                |       |             |
| Bi_5-3          | 20   | 13           |                |       |             |
| Bi_6-3          | 26   | 127          |                |       |             |
| Bi_7-3          | 8    | 54           |                |       |             |
| subgenome total | 225  | 312          |                |       |             |



Table S9. Chromosomal location and size of telomeres. Bold indicates both telomeres were assembled.

| GP33 chromosome  | chromosome location | distance (bp) to chromosome end | length (bp) |
|------------------|---------------------|---------------------------------|-------------|
| Fchil1-Av        | 5'                  | 16                              | 1187        |
| Fchil1-B1        | 5'                  | 1                               | 1190        |
| Fchil1-B2        | 5'                  | 1                               | 1112        |
| Fchil1-B2        | interstitial        | 1646438                         | 105         |
| Fchil1-B2        | interstitial        | 12252106                        | 151         |
| Fchil1-Bi        | none                |                                 |             |
| <b>Fchil2-Av</b> | 5' or interstitial  | 270018                          | 1298        |
| <b>Fchil2-Av</b> | 3'                  | 0                               | 999         |
| Fchil2-B1        | 5'                  | 16879                           | 1017        |
| Fchil2-B1        | interstitial        | 8712246                         | 121         |
| <b>Fchil2-B2</b> | 5'                  | 1                               | 1207        |
| <b>Fchil2-B2</b> | 3'                  | 2                               | 1100        |
| <b>Fchil2-Bi</b> | 5'                  | 1                               | 1096        |
| <b>Fchil2-Bi</b> | 3'                  | 0                               | 1053        |
| Fchil2-Bi        | interstitial        | 15204595                        | 103         |
| Fchil3-Av        | 3'                  | 1                               | 863         |
| Fchil3-B1        | none                |                                 |             |
| Fchil3-B2        | 5'                  | 1                               | 1076        |
| Fchil3-B2        | interstitial        | 14457307                        | 115         |
| Fchil3-Bi        | interstitial        | 24253127                        | 104         |
| Fchil3-Bi        | interstitial        | 1886773                         | 119         |
| Fchil4-Av        | 3'                  | 0                               | 1072        |
| Fchil4-B1        | 5'                  | 1                               | 1292        |
| Fchil4-B2        | 3'                  | 10539                           | 1064        |
| Fchil4-B2        | interstitial        | 19792249                        | 122         |
| Fchil4-Bi        | 3'                  | 15901                           | 1201        |
| Fchil4-Bi        | interstitial        | 18568406                        | 112         |
| <b>Fchil5-Av</b> | 5'                  | 1                               | 1313        |
| <b>Fchil5-Av</b> | 3' or interstitial  | 2434773                         | 855         |
| Fchil5-Av        | interstitial        | 3913948                         | 132         |
| <b>Fchil5-B1</b> | 5'                  | 24055                           | 768         |
| <b>Fchil5-B1</b> | 3'                  | 0                               | 1091        |
| Fchil5-B1        | interstitial        | 3808286                         | 109         |
| <b>Fchil5-B2</b> | 5'                  | 21444                           | 1113        |
| <b>Fchil5-B2</b> | 3'                  | 0                               | 1219        |
| Fchil5-Bi        | 3'                  | 14816                           | 1128        |
| Fchil5-Bi        | interstitial        | 3829478                         | 105         |
| Fchil6-Av        | 5'                  | 1                               | 852         |
| Fchil6-B1        | 5'                  | 16                              | 1170        |

|                  |              |          |      |
|------------------|--------------|----------|------|
| Fchil6-B2        | 5'           | 130      | 980  |
| <b>Fchil6-Bi</b> | 5'           | 11       | 1129 |
| <b>Fchil6-Bi</b> | 3'           | 30409    | 976  |
| Fchil6-Bi        | interstitial | 27772226 | 102  |
| <b>Fchil7-Av</b> | 5'           | 1        | 1257 |
| <b>Fchil7-Av</b> | 3'           | 0        | 1093 |
| <b>Fchil7-B1</b> | 5'           | 1        | 1339 |
| <b>Fchil7-B1</b> | 3'           | 0        | 1123 |
| Fchil7-B2        | 3'           | 0        | 1199 |
| Fchil7-Bi        | 3'           | 0        | 1065 |

Table S10. Regions of homeologous exchange (HE) in the W haplotig alignment. The SDR is located between *F. vesca* chromosome 6 position 38499517-38499527. The closest regions of HE are marked with an asterisk and are 169 kbp and 406 kbp away.

| <b>alignment block</b> | <b>length (bp)</b> | <b>homeologous exchange</b> | <b>vesca chrom 6 start</b> | <b>vesca chrom 6 end</b> | <b>combined length (bp)</b> |
|------------------------|--------------------|-----------------------------|----------------------------|--------------------------|-----------------------------|
| LCB_268                | 24403              | HE Fvb6-2                   | 38091470                   | 38115872                 |                             |
| LCB_267                | 16836              | HE Fvb6-2                   | 38121270                   | 38138105                 |                             |
| combined               | 41239              |                             | 38091470                   | 38138105                 | 46635                       |
| LCB_321                | 9496               | HE Fvb6-2                   | 38315210                   | 38324707                 |                             |
| LCB_320                | 3828               | HE Fvb6-2                   | 38324708                   | 38328537                 |                             |
| LCB_332                | 2318               | HE Fvb6-2                   | 38328538                   | 38330857*                |                             |
| combined               | 15642              |                             | 38315210                   | 38330857                 | 15647                       |
| LCB_476                | 11878              | HE Fvb6-2                   | 38905957*                  | 38917834                 |                             |
| LCB_300                | 18232              | HE Fvb6-2                   | 38967100                   | 38985331                 |                             |
| LCB_351                | 3137               | HE Fvb6-2                   | 38985332                   | 38988468                 |                             |
| LCB_357                | 25208              | HE Fvb6-2                   | 38988469                   | 39013676                 |                             |
| combined               | 58455              |                             | 38905957                   | 39013676                 | 107719                      |
| LCB_150                | 16562              | HE Fvb6-3                   | 39414823                   | 39431384                 | 16561                       |

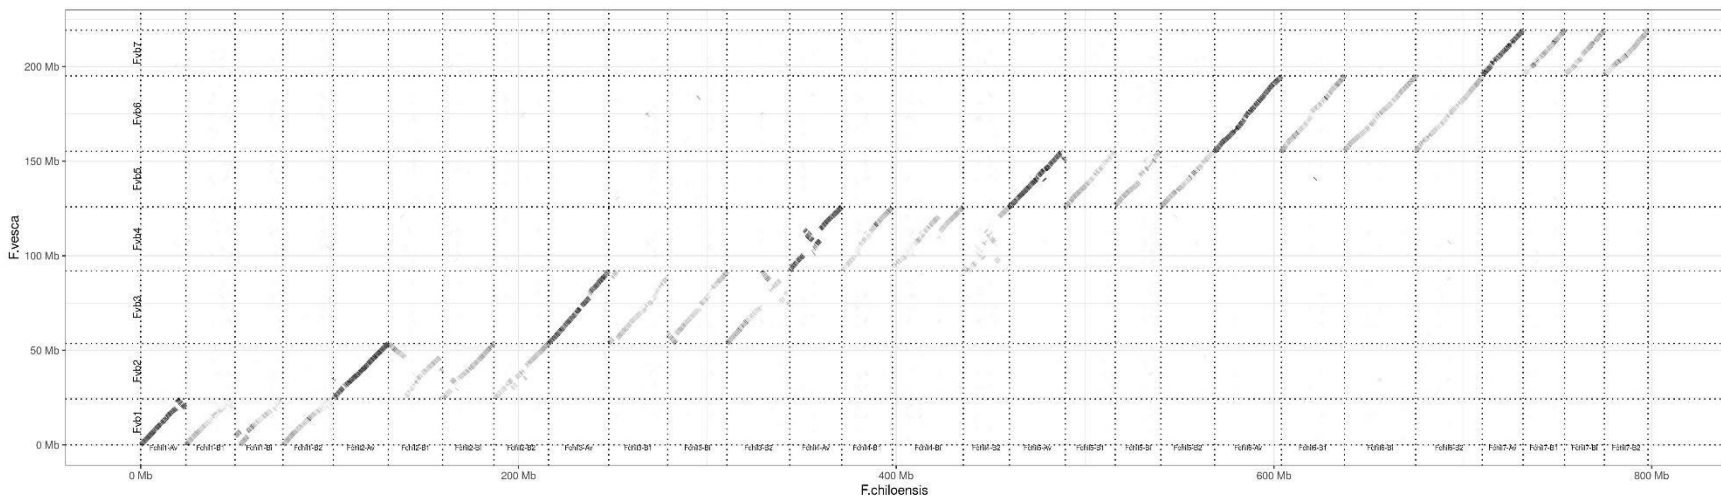

Fig. S1: Dotplot of a minimap2 alignment between *F. chiloensis* (octoploid) assembly and *F. vesca* (diploid).

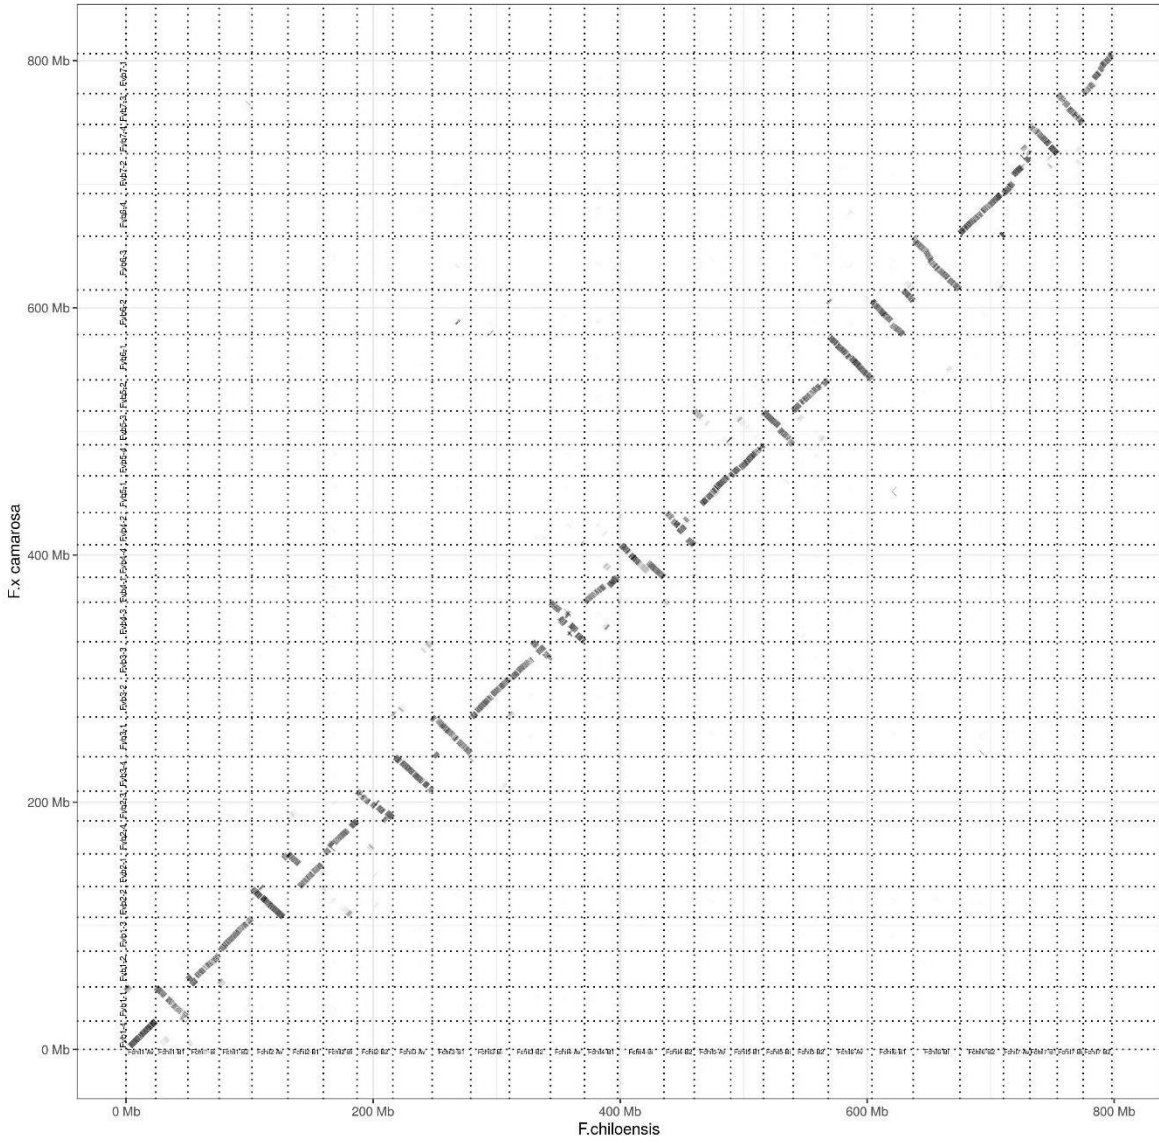

Fig. S2:Dotplot of a minimap2 alignment between *F. chiloensis* (octoploid) assembly and *F. x 'Camarosa'* (octoploid).

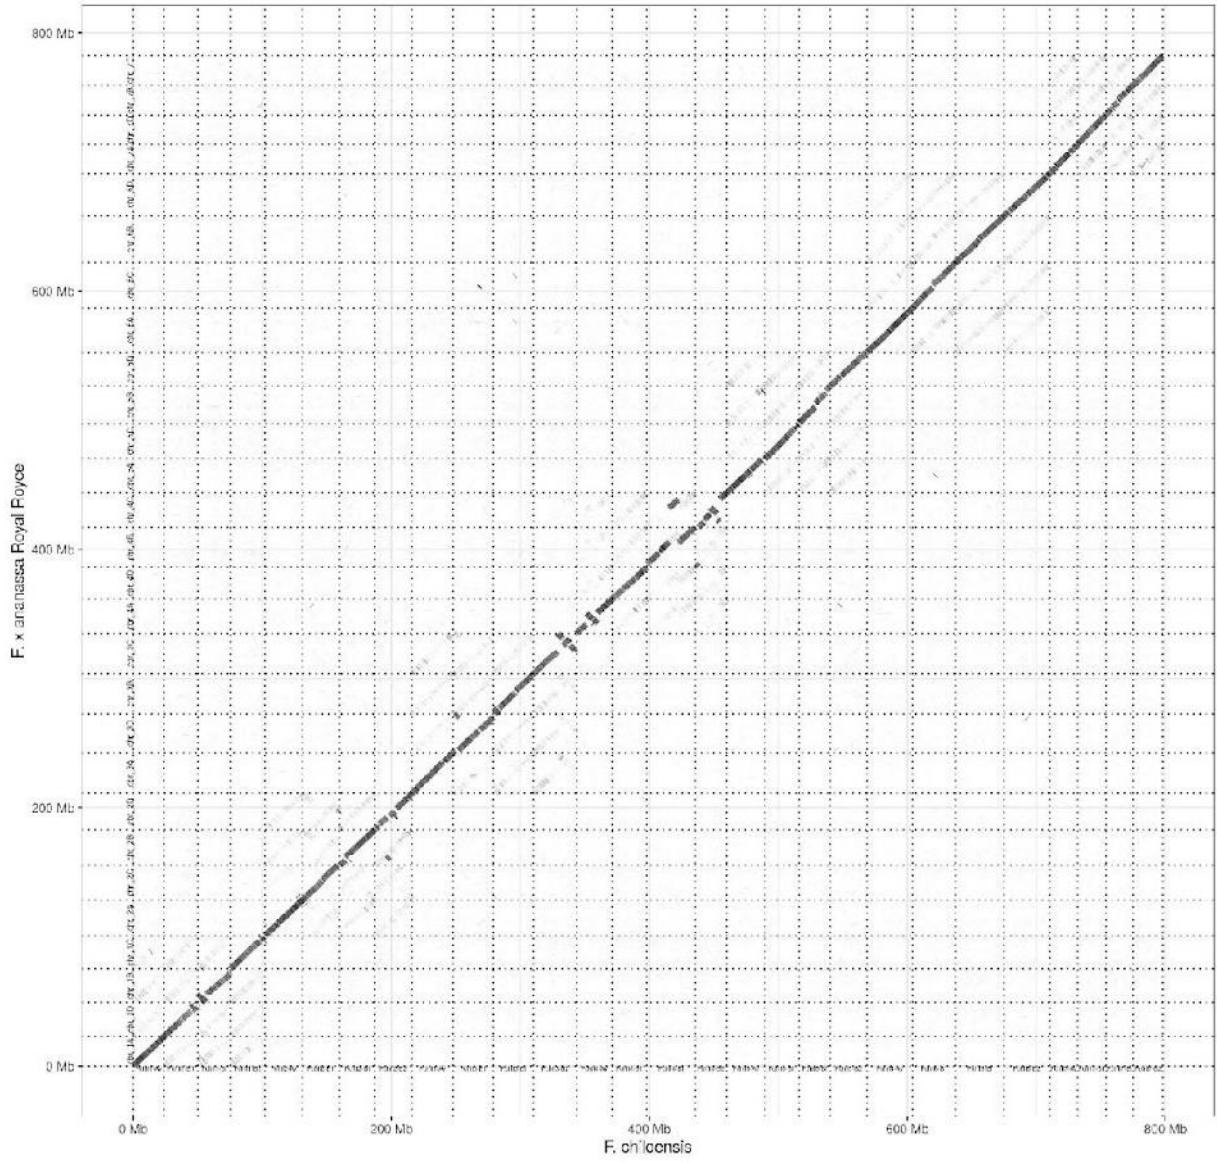

Fig. S3: Dotplot of a minimap2 alignment between *F. chiloensis* (octoploid) assembly and *F. x 'Royal Royce'* (octoploid).

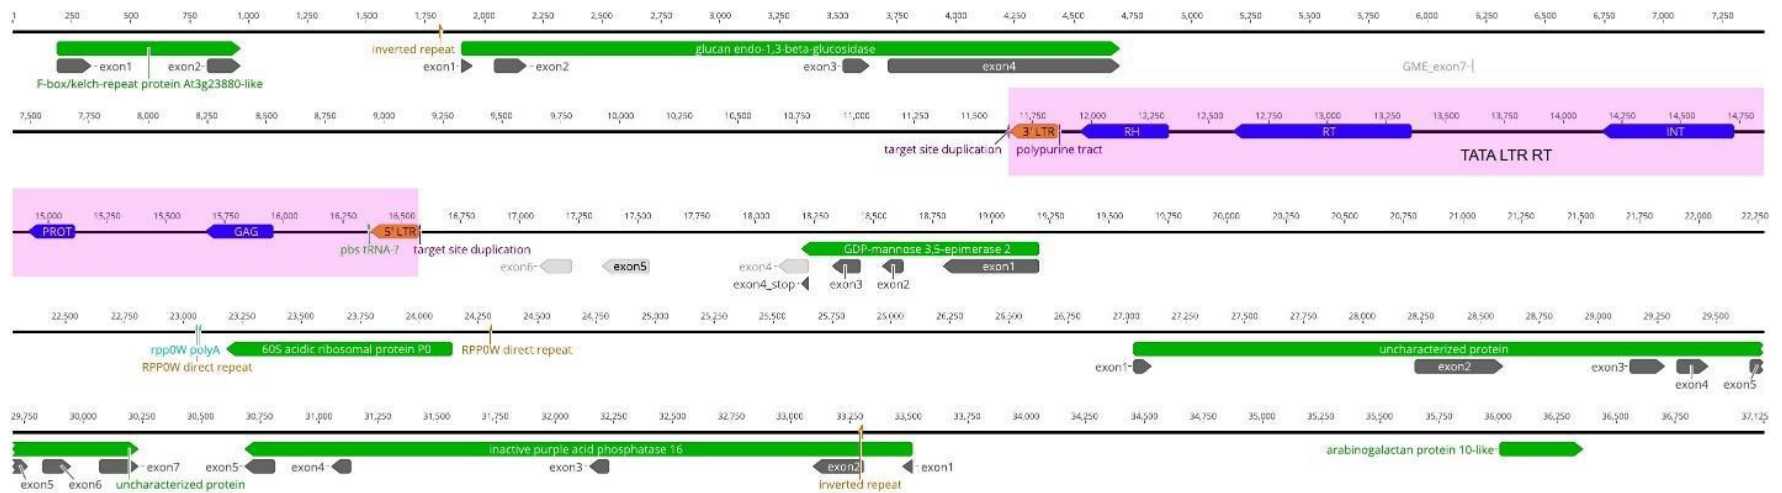

Fig. S4: Diagram of the W SDR with gene and LTR retrotransposon annotation. The non-canonical (TATA) LTR RT is shaded in pink. GDP-mannose 3',5' epimerase (GMEW) has a premature stop codon relative to the ancestral sequence - the original exons 4-7 are shaded in light gray.

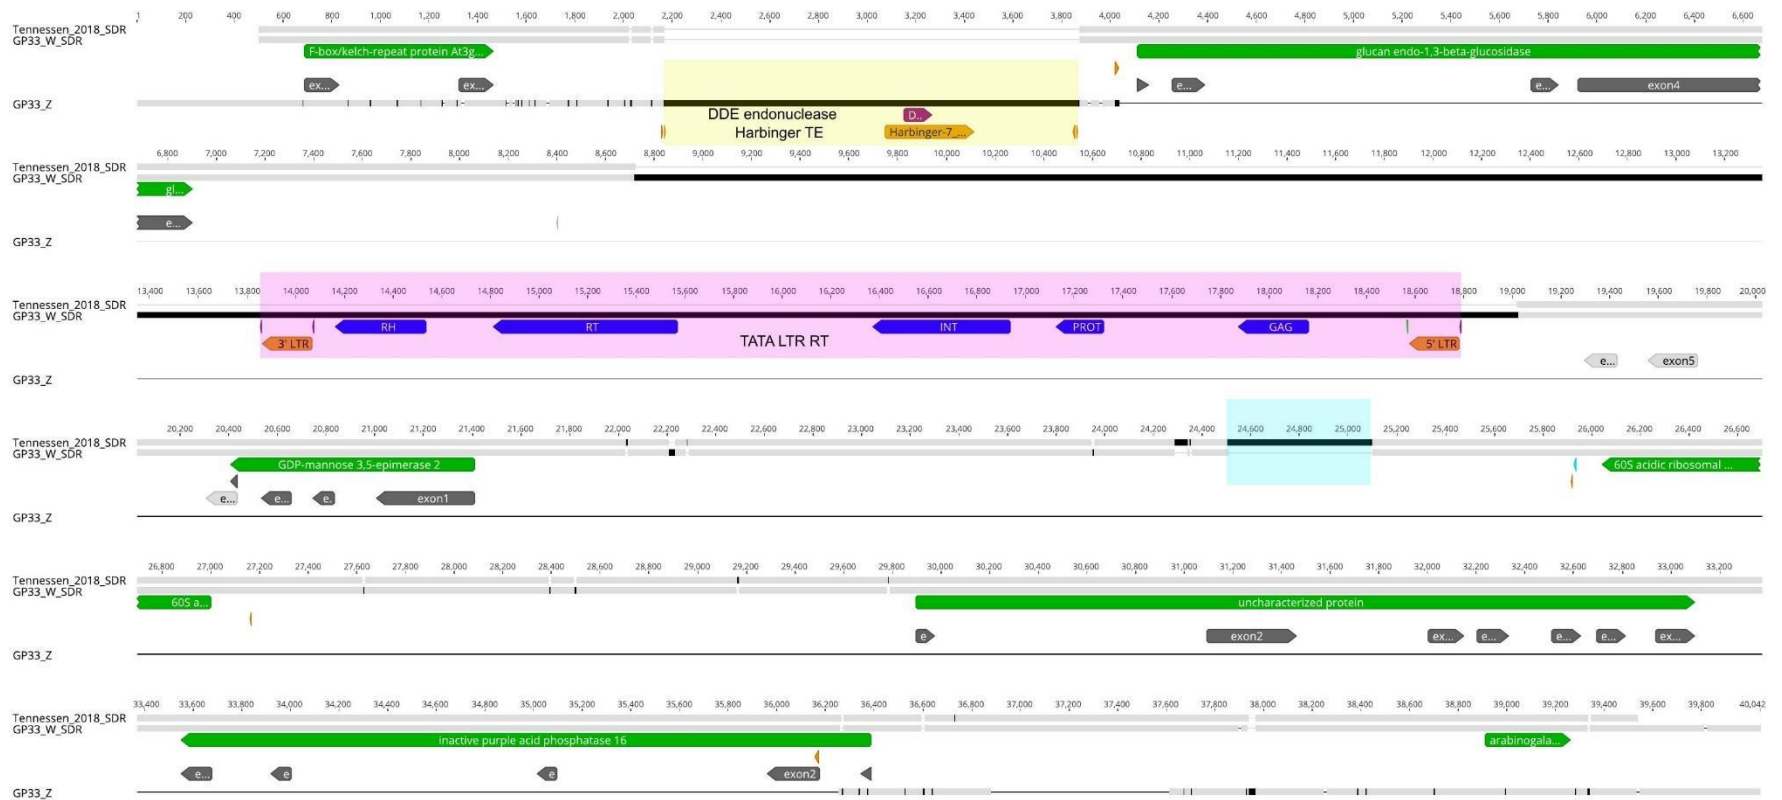

Fig. S5: Diagram of the MAFFT alignment of the W SDR (previously published and current versions) and homologous Z sequence. The Z-specific Harbinger TE is shaded in yellow. The non-canonical (TATA) LTR RT is shaded in pink. The originally misassembled hAT TE is shown in light blue.



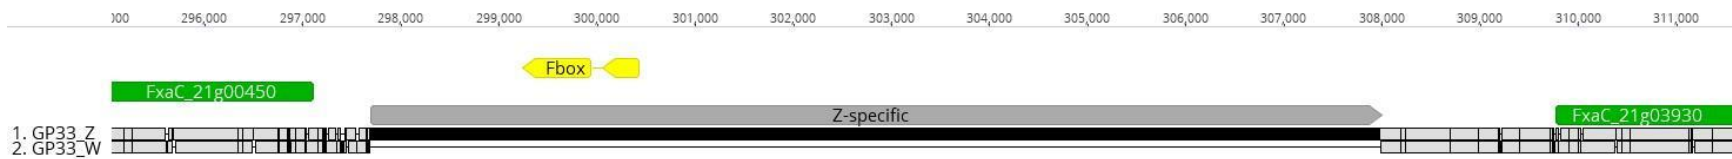

*Fig. S6: Diagram of a subset of an AnchorWave alignment between the Z and W sequence of GP33. The Z specific region with no W homolog is highlighted in grey. The predicted coding region of the Z specific Fbox gene is in yellow. Genes with homologs on the Z and W annotated with the liftOff program are in green. The Figure was obtained from Geneious R9.1.*

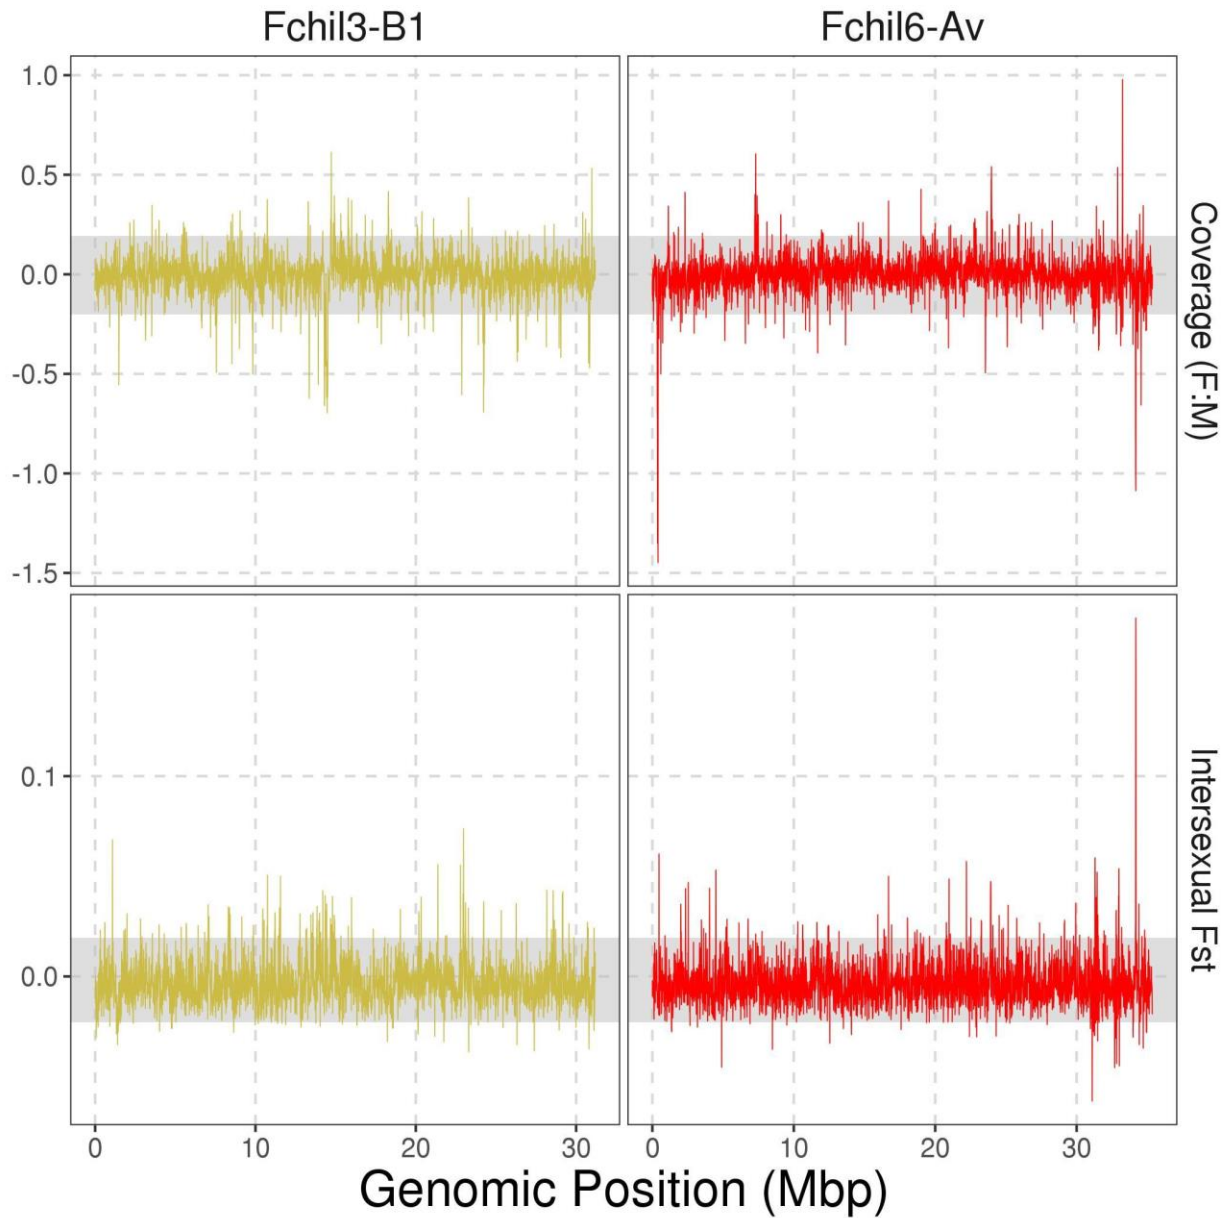

Fig. S7: Comparison of the sex chromosome *Fchil6-Av* and an autosome *Fchil3-B1* for male vs. female coverage ( $\log_2(\text{mean } F) - \log_2(\text{mean } M)$ ) and intersexual weighted *Fst* in non-overlapping 10kb windows. The grey area represents the 95% confidence interval obtained by resampling a representative autosome (*Fchil3-B1*) 1000 times.

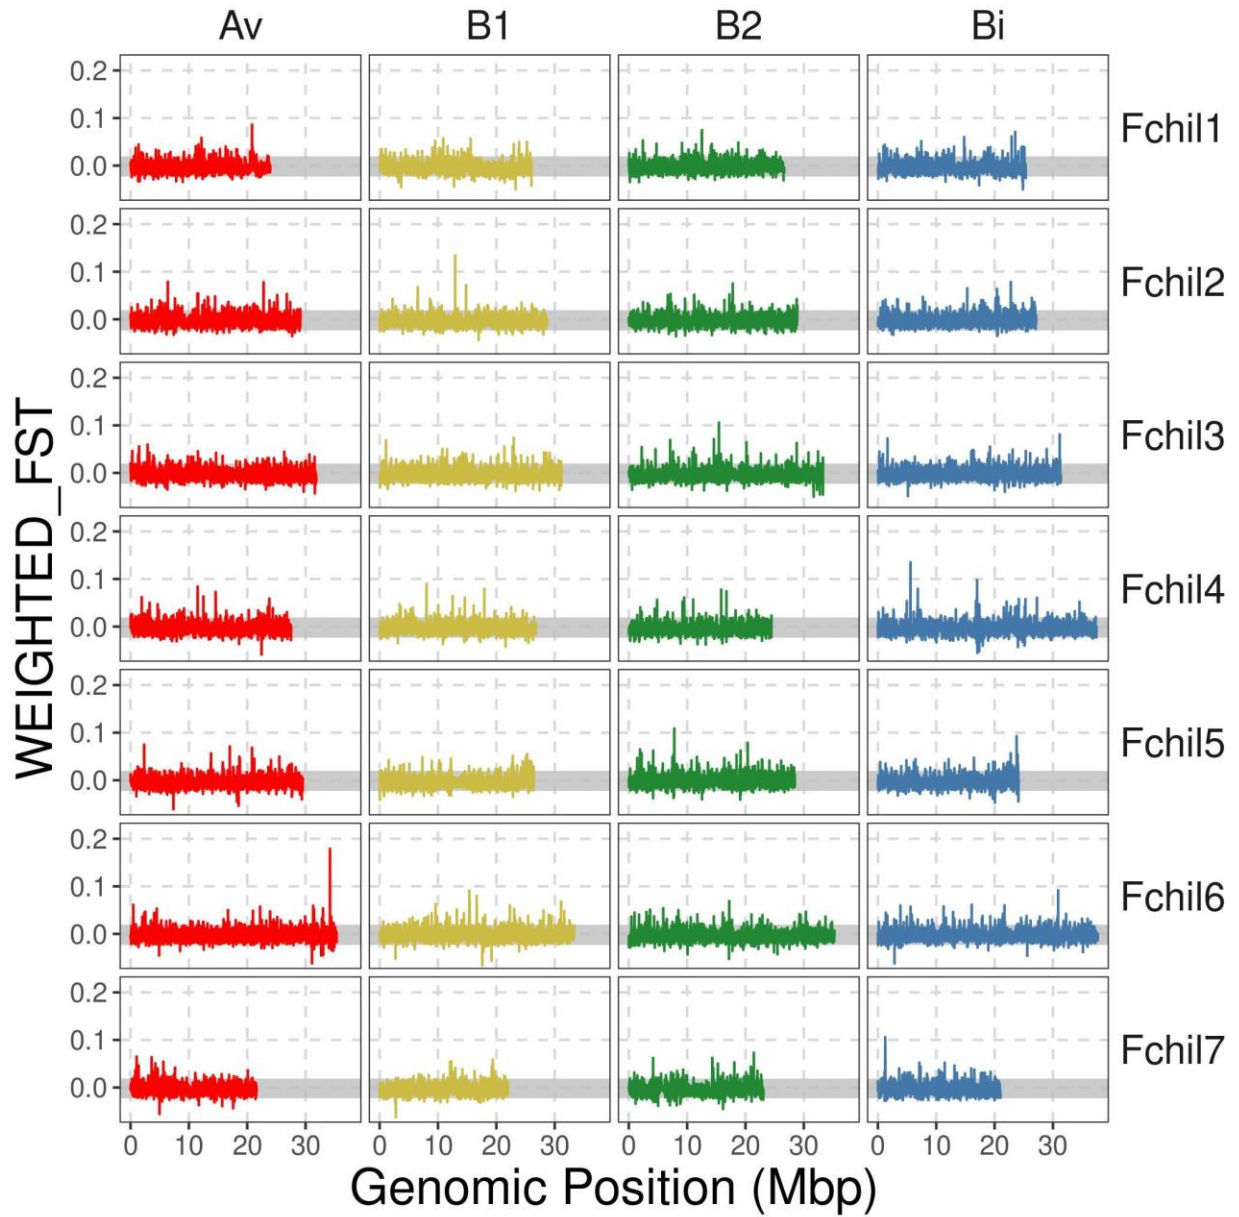

*Fig. S8: Intersexual weighted  $F_{st}$  on non-overlapping 10kb windows across all 28 GP33 chromosomes. The grey area represents the 95% confidence interval obtained by resampling  $F_{st}$  values from a representative autosome (Fchil3-B1) 1000 times.*

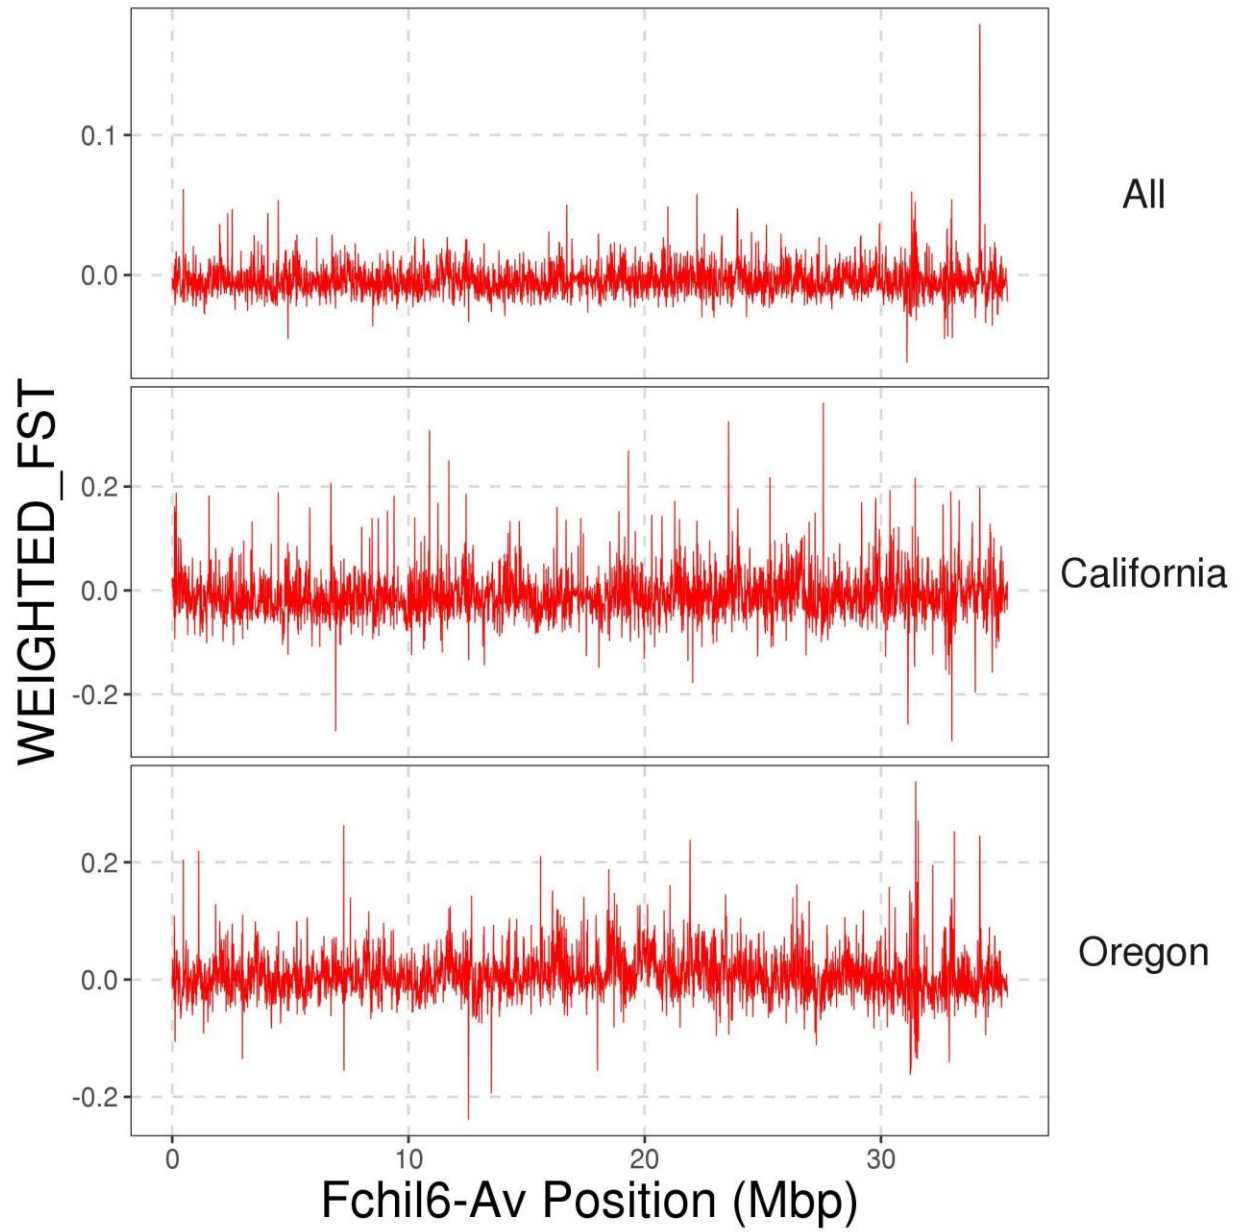

*Fig. S9: Intersexual weighted  $F_{st}$  on non-overlapping 10kb windows on the sex chromosome Fchil6-Av. Comparison of all samples, California only, and Oregon only.*

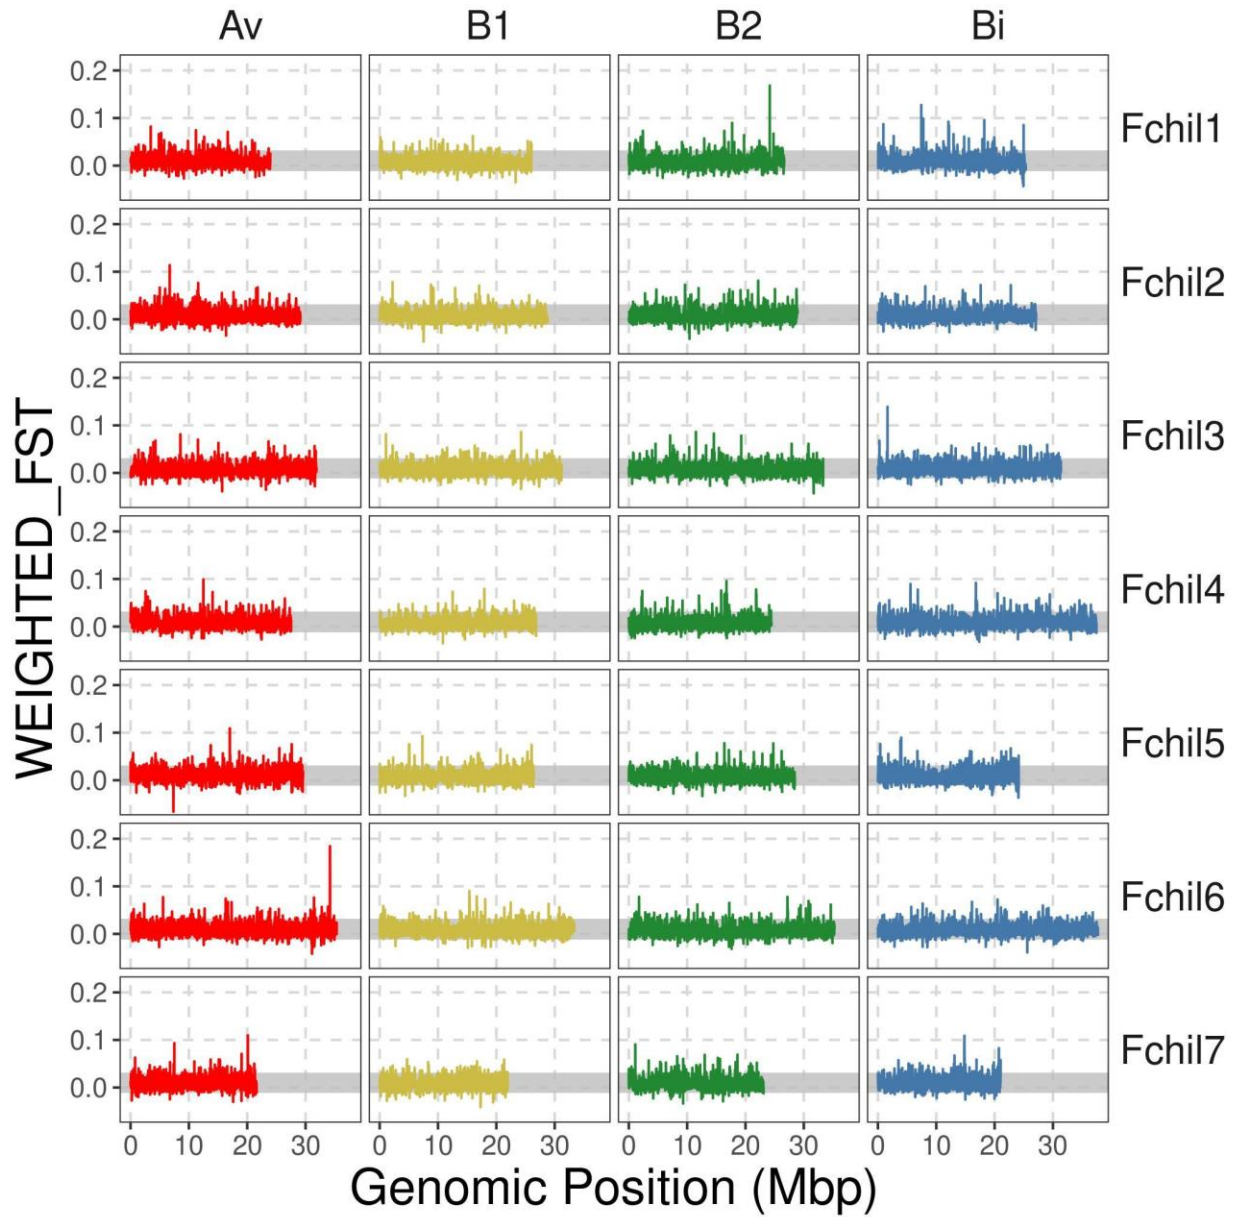

*Fig. S10: Intersexual weighted Fst on non-overlapping 10kb windows across all 28 GP33 chromosomes for the full dataset (13 females and 25 males). The grey area represents the 95% confidence interval obtained by resampling Fst values from a representative autosome (Fchil3-B1) 1000 times.*

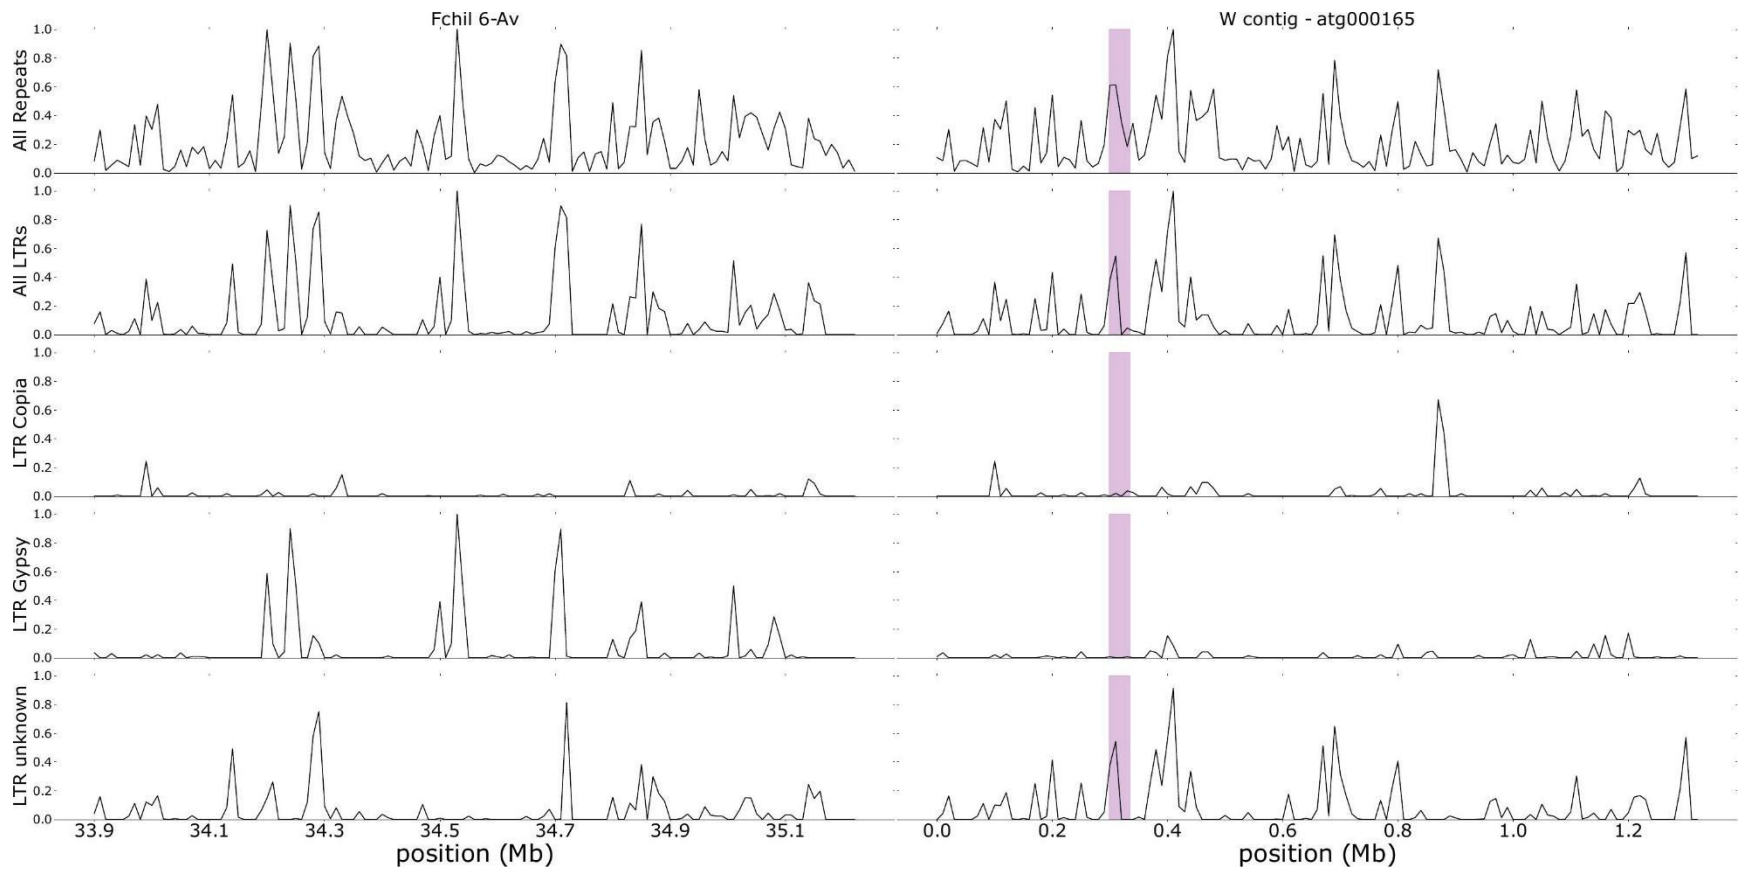

*Fig. S11: Comparison of the abundance of all repeats and LTR RT superfamilies on the W haplotig and homologous sequence of the Z chromosome. The purple area represents the location of the SDR.*



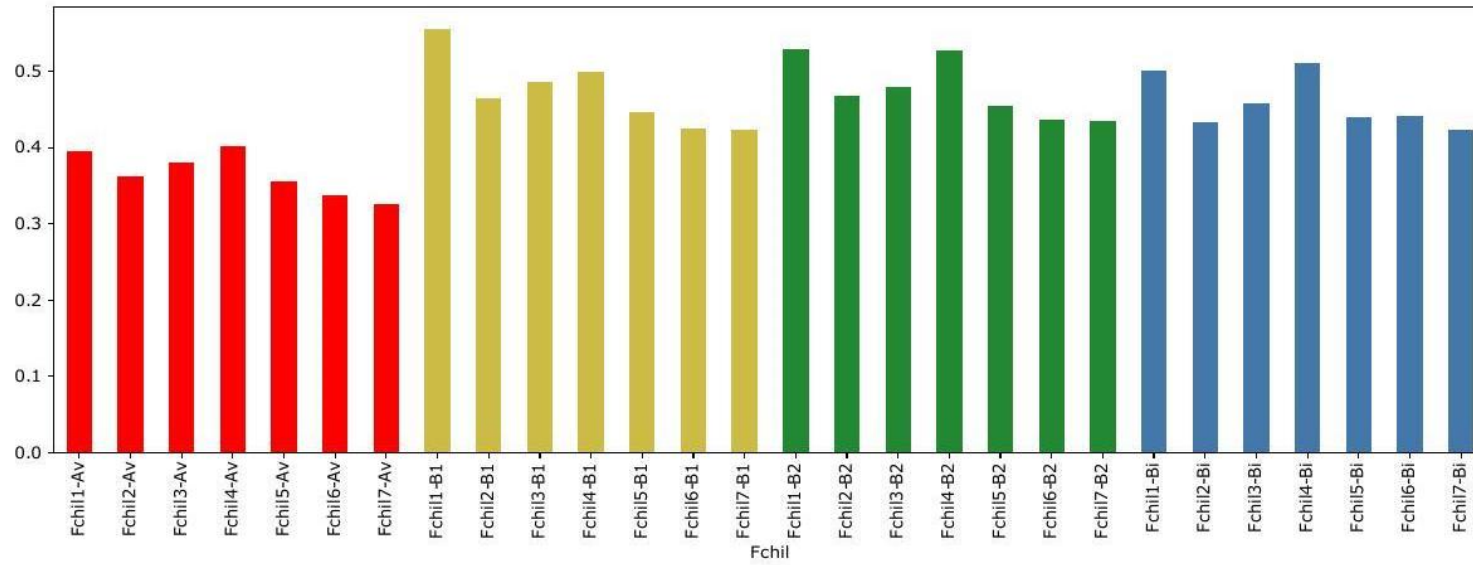

Fig. S12: Repeat coverage across the chromosomes of *F. chiloensis*. The colors correspond to the subgenome they originated from: Av (red), B1 (yellow), B2 (green), and Bi (blue).

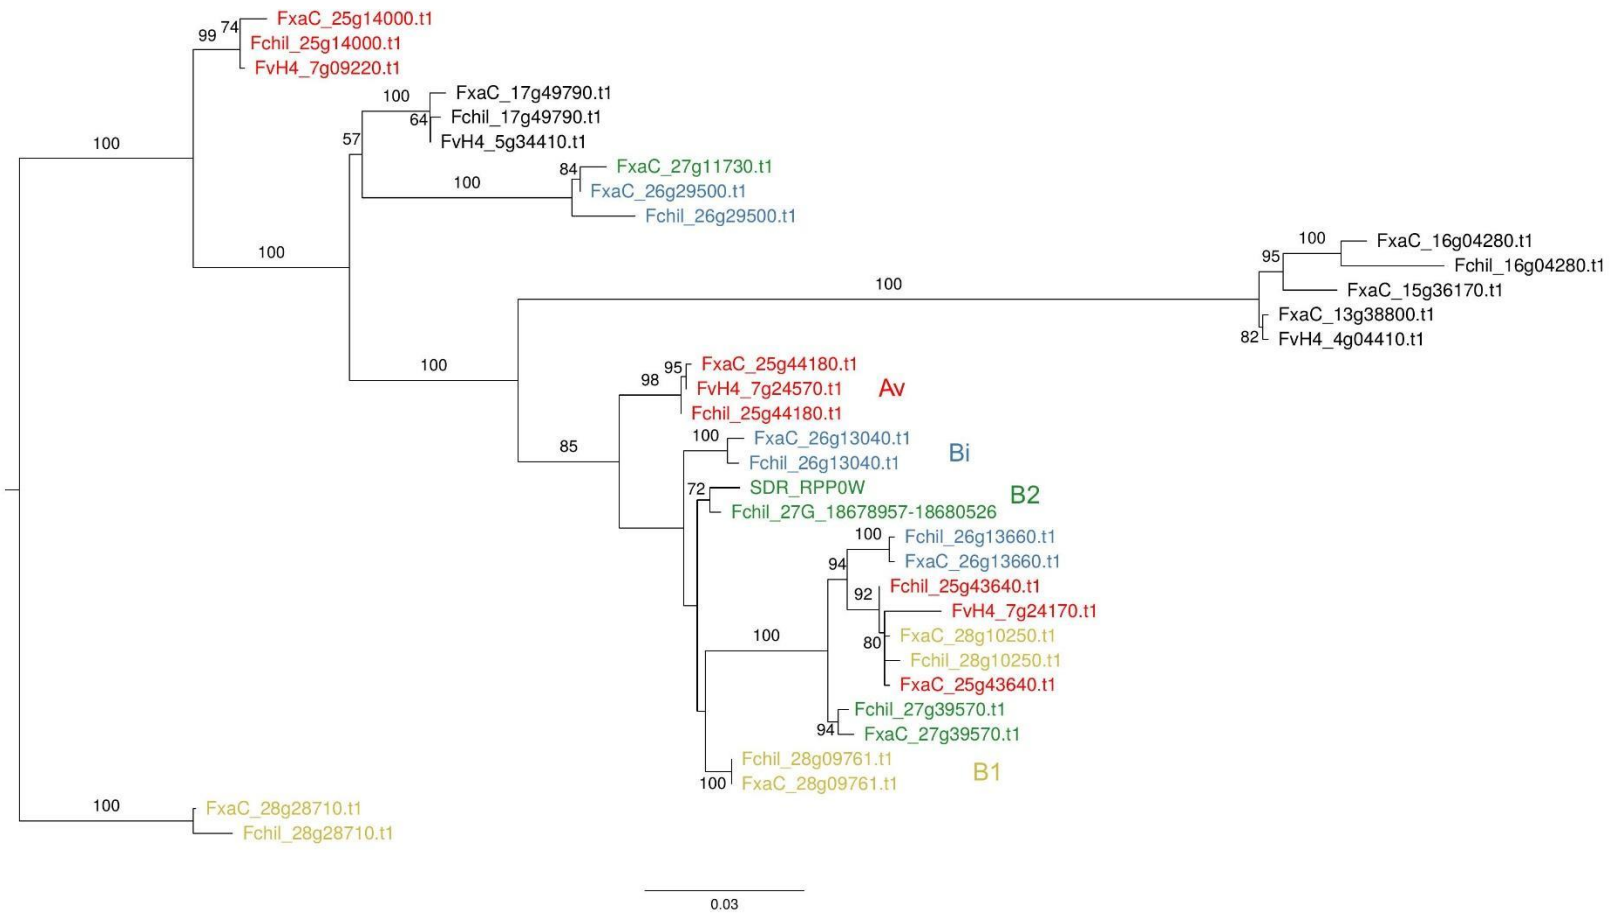

Fig. S13: Maximum likelihood phylogenetic tree for ribosomal protein P0 (RPP0) with bootstrap values. For gene prefixes, Fchil is *Fragaria chiloensis*, FxaC is *F. x ananassa* 'Camarosa', and FvH4 is *F. vesca*. Colors correspond to the subgenome of origin: Av (red), B1 (yellow), B2 (green), and Bi (blue).



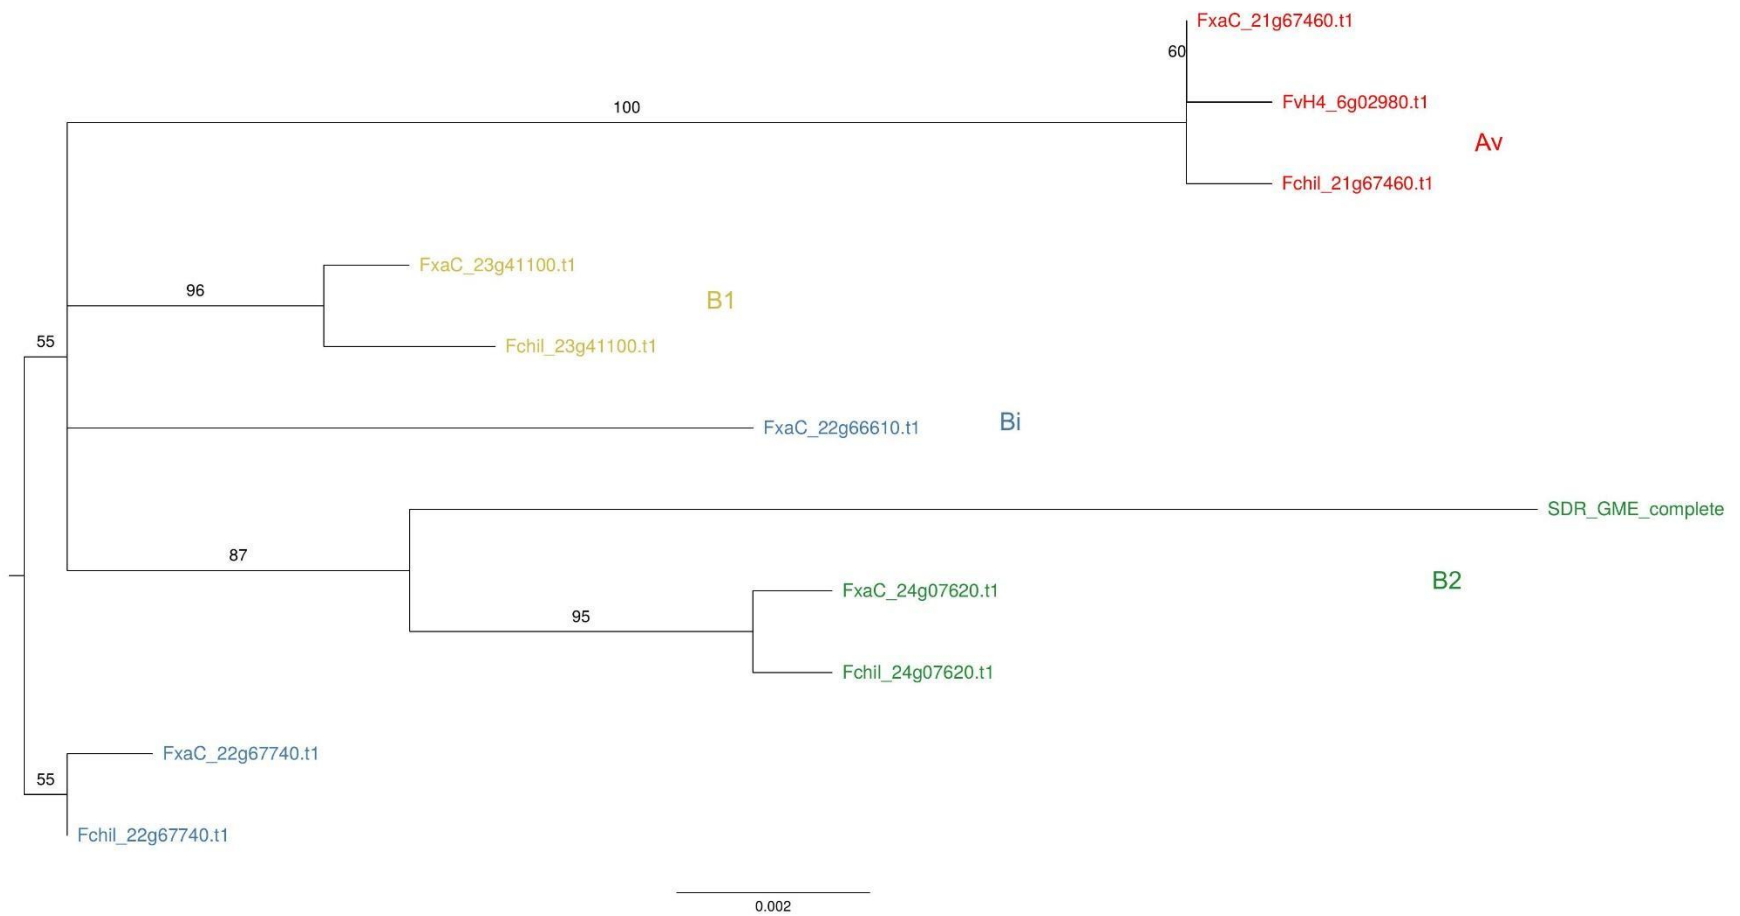

Fig. S14: Maximum likelihood phylogenetic tree for GDP-mannose-3',5'-epimerase (GME) with bootstrap values. For gene prefixes, Fchil is *Fragaria chiloensis*, FxaC is *F. x ananassa* 'Camarosa', and FvH4 is *F. vesca*. Colors correspond to the subgenome of origin: Av, B1 (yellow), B2 (green), and Bi (blue).

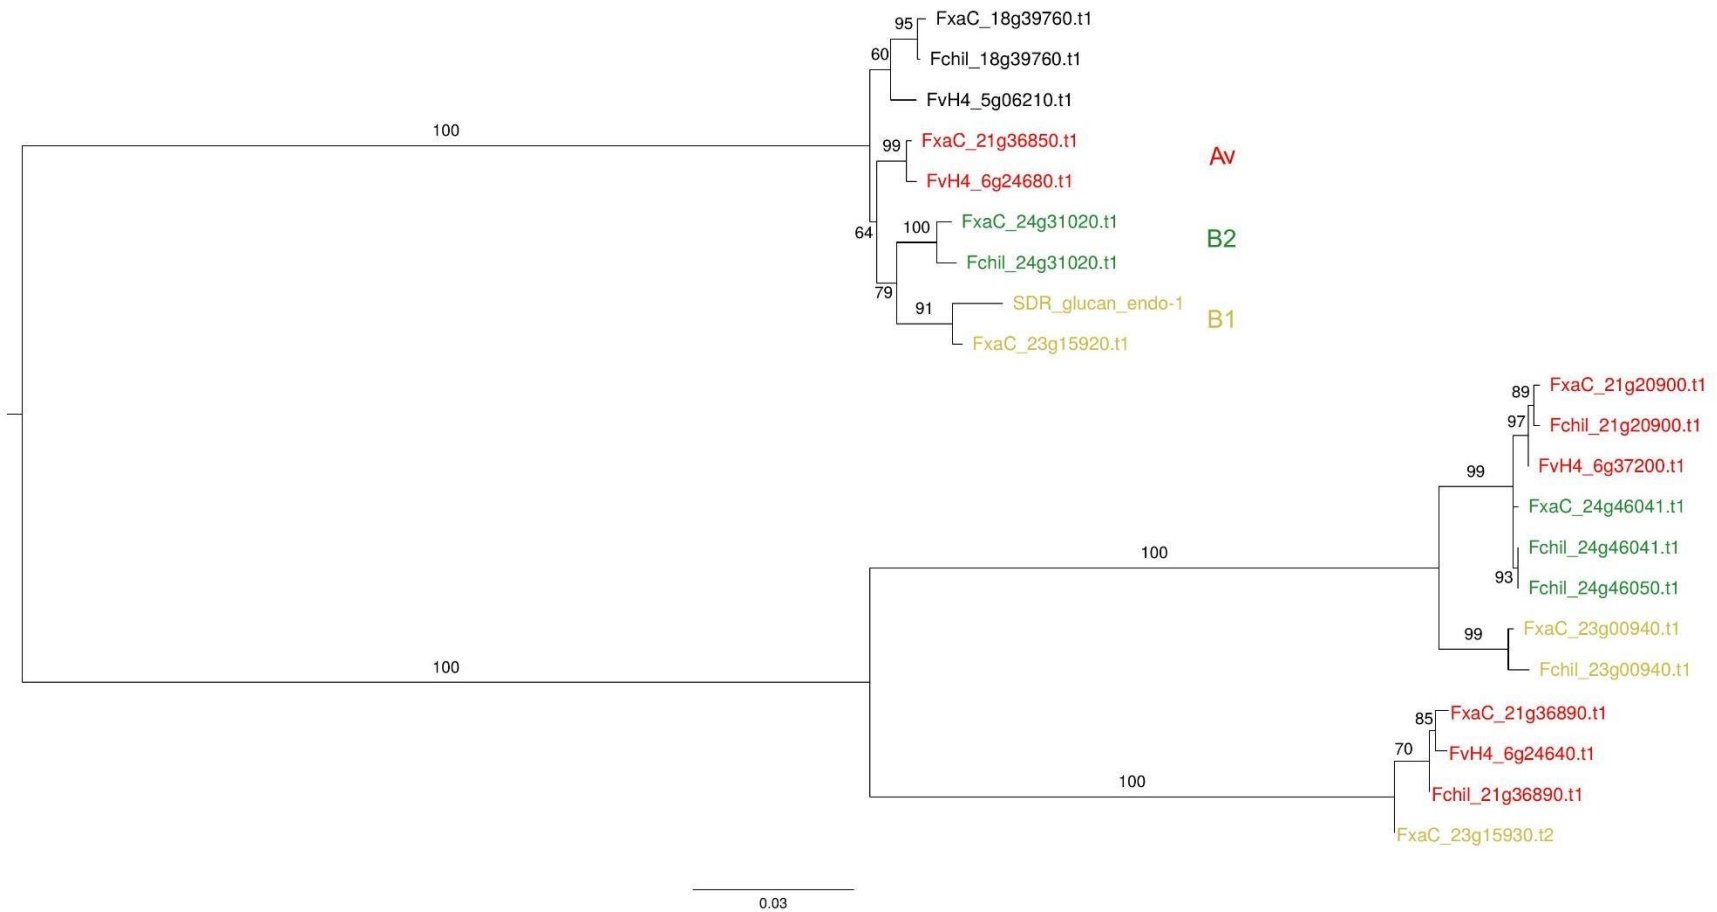

Fig. S15: Maximum likelihood phylogenetic tree for glucan endo-1,3 beta-glucosidase with bootstrap values. For gene prefixes, Fchil is *Fragaria chiloensis*, FxaC is *F. x ananassa* 'Camarosa', and FvH4 is *F. vesca*. Colors correspond to the subgenome of origin: Av (red), B1 (yellow), B2 (green), and Bi (blue).

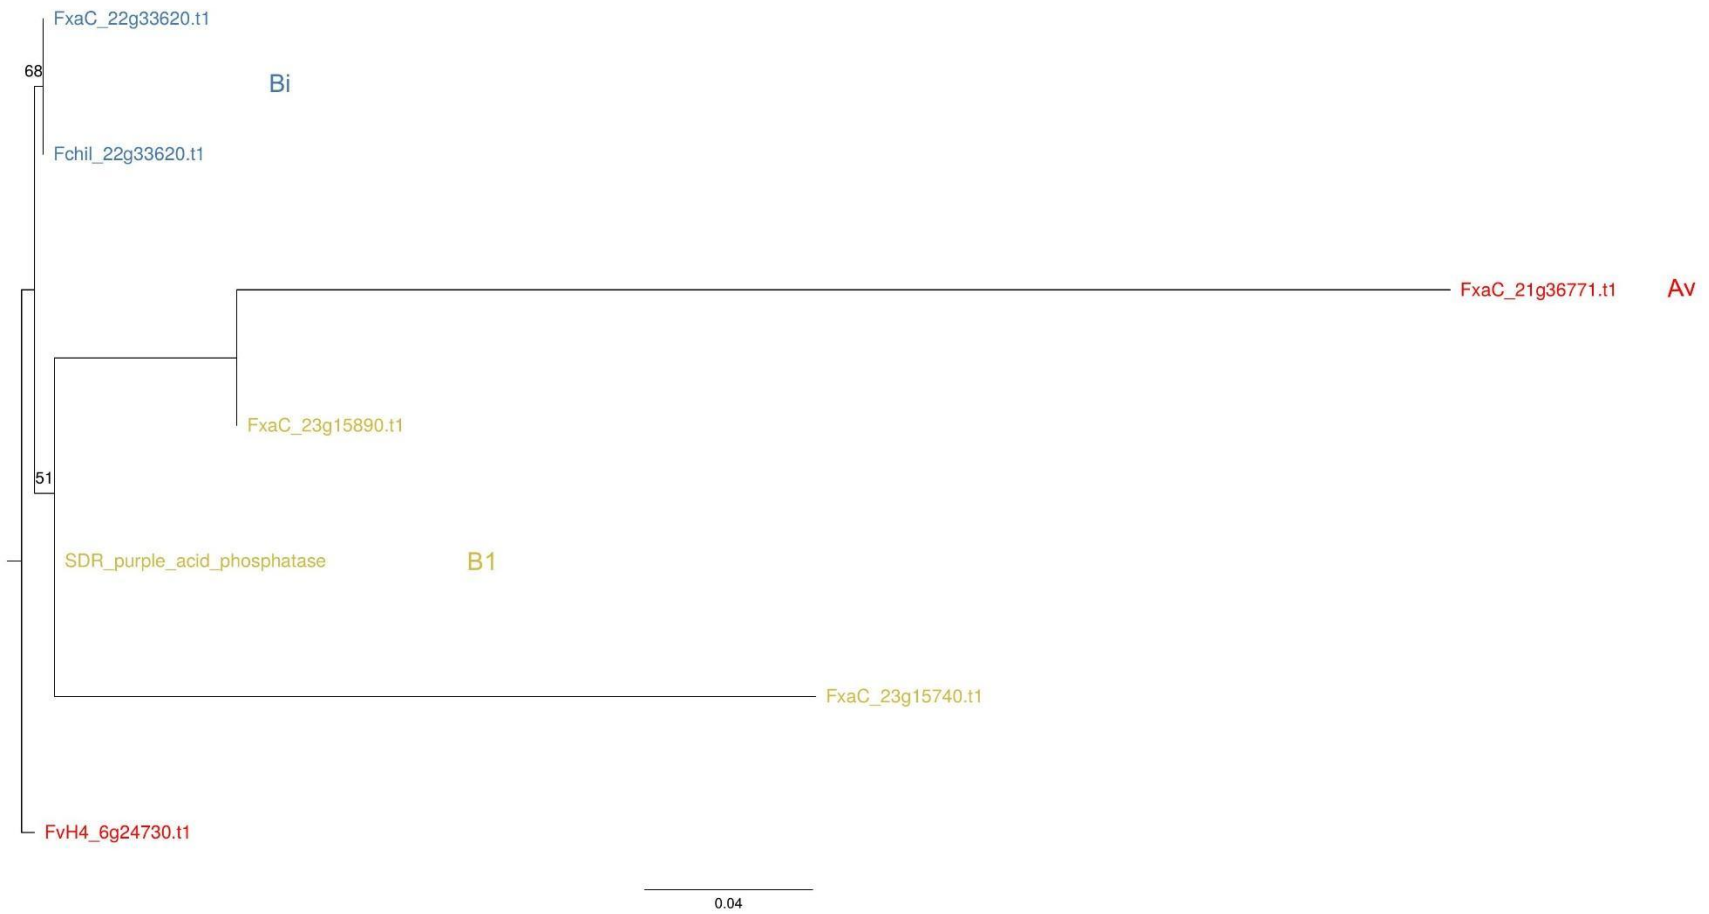

Fig. S16: Maximum likelihood phylogenetic tree for inactive purple acid phosphatase 16 with bootstrap values. For gene prefixes, Fchil is *Fragaria chiloensis*, FxaC is *F. x ananassa* 'Camarosa', and FvH4 is *F. vesca*. Colors correspond to the subgenome of origin: Av (red), B1 (yellow), B2 (green), and Bi (blue).

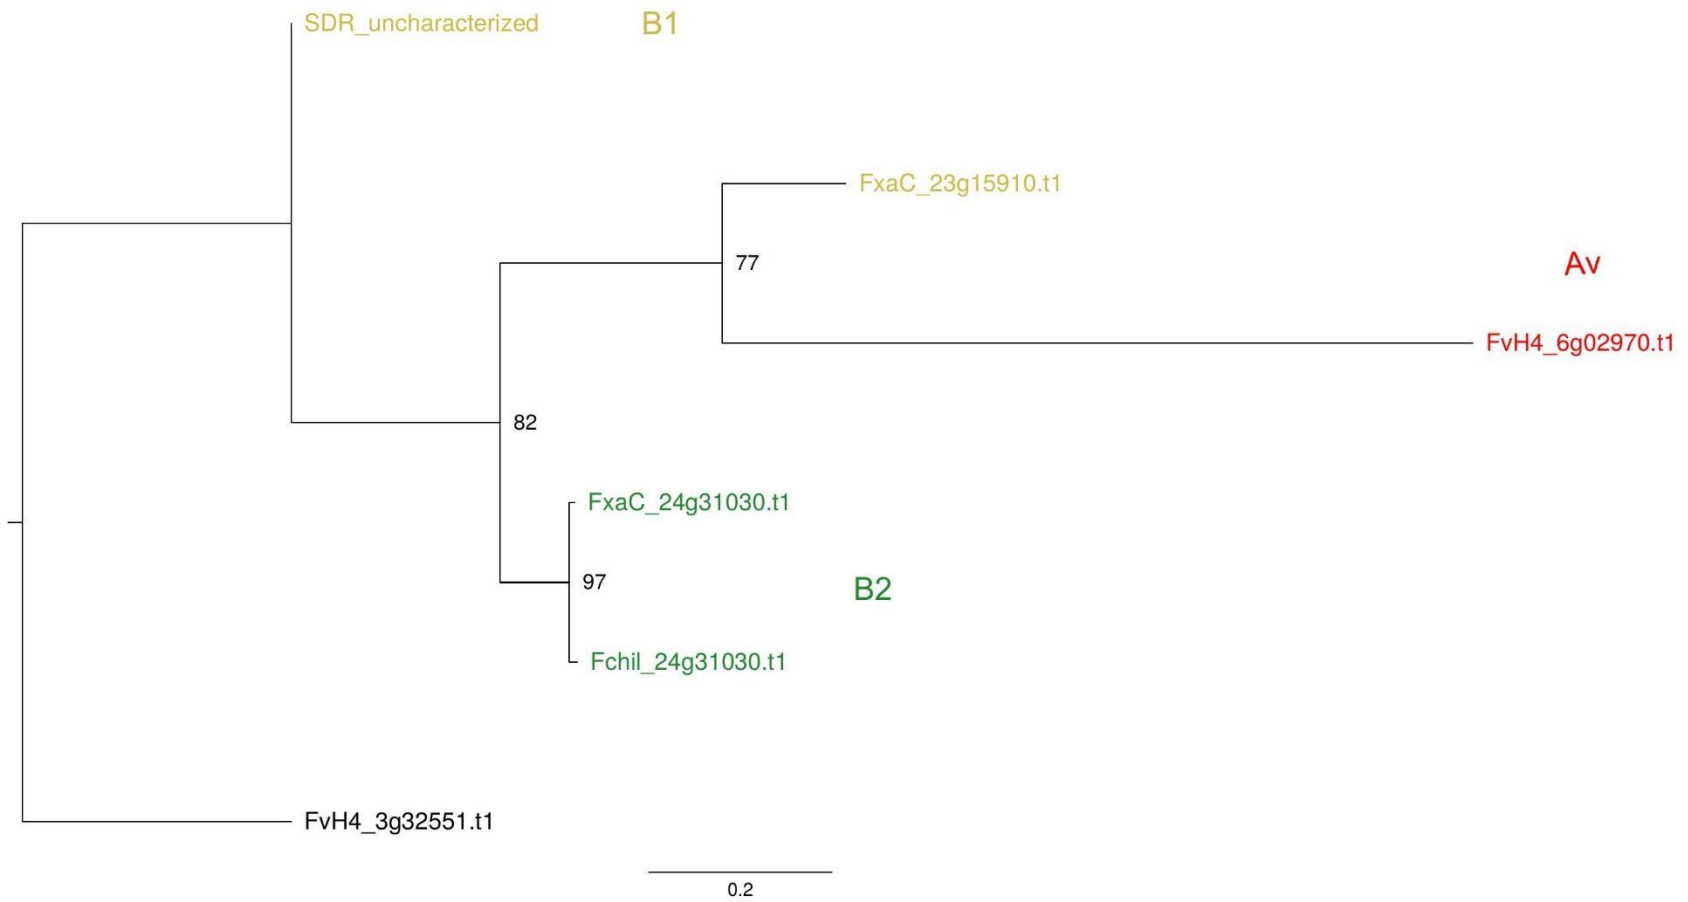

Fig. S17: Maximum likelihood phylogenetic tree for the SDR uncharacterized protein with bootstrap values. For gene prefixes, Fchil is *Fragaria chiloensis*, FxaC is *F. x ananassa* 'Camarosa', and FvH4 is *F. vesca*. Colors correspond to the subgenome of origin: Av (red), B1 (yellow), B2 (green), and Bi (blue).

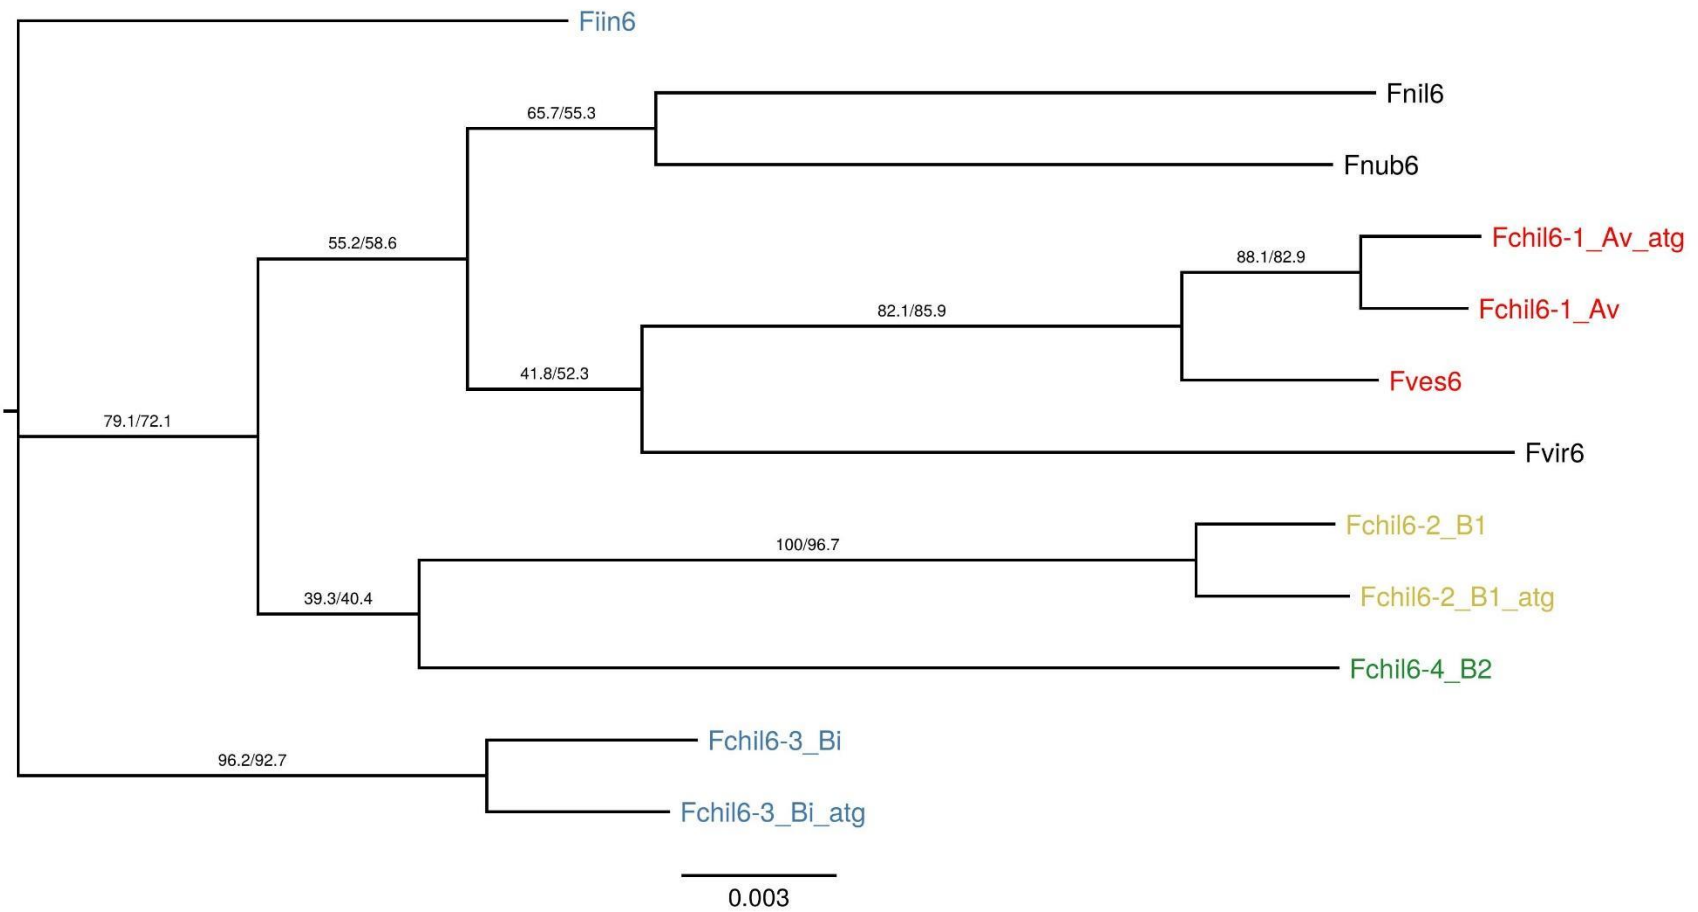

Fig. S18: Maximum likelihood phylogenetic tree for the haplotype-resolved Z and W, the other chromosome 6 homeologs (autosomes) and diploid *Fragaria* species. For gene prefixes, Fchil is *Fragaria chiloensis*, FxaC is *F. x ananassa* 'Camarosa', and FvH4 is *F. vesca*. Colors correspond to the octoploid subgenome and diploid progenitor: Av (red), B1 (yellow), B2 (green), and Bi (blue).
